# Supplementary material for: Identifying optimal frameworks to implement or evaluate digital health interventions: a scoping review protocol
Source: PubMed Central journal article supplement — BMJ Open. 2020 Aug 13;10(8):e037643. doi: 10.1136/bmjopen-2020-037643 (PMC7430416; doi:10.1136/bmjopen-2020-037643), 2020-08-13

# BMJ Open

BMJ Open is committed to open peer review. As part of this commitment we make the peer review history of every article we publish publicly available.

When an article is published we post the peer reviewers' comments and the authors' responses online. We also post the versions of the paper that were used during peer review. These are the versions that the peer review comments apply to.

The versions of the paper that follow are the versions that were submitted during the peer review process. They are not the versions of record or the final published versions. They should not be cited or distributed as the published version of this manuscript.

BMJ Open is an open access journal and the full, final, typeset and author-corrected version of record of the manuscript is available on our site with no access controls, subscription charges or pay-per-view fees (<http://bmjopen.bmj.com>).

If you have any questions on BMJ Open's open peer review process please email [info.bmjopen@bmj.com](mailto:info.bmjopen@bmj.com)

# BMJ Open

## Identifying optimal frameworks to implement or evaluate digital health interventions: A scoping review protocol

|                               |                                                                                                                                                                                                                                                                                                                                                                                                                                                                                                                                                                                                                                                                                                                                                                                                                                                                                                                                                                                                                                                                            |
|-------------------------------|----------------------------------------------------------------------------------------------------------------------------------------------------------------------------------------------------------------------------------------------------------------------------------------------------------------------------------------------------------------------------------------------------------------------------------------------------------------------------------------------------------------------------------------------------------------------------------------------------------------------------------------------------------------------------------------------------------------------------------------------------------------------------------------------------------------------------------------------------------------------------------------------------------------------------------------------------------------------------------------------------------------------------------------------------------------------------|
| Journal:                      | <i>BMJ Open</i>                                                                                                                                                                                                                                                                                                                                                                                                                                                                                                                                                                                                                                                                                                                                                                                                                                                                                                                                                                                                                                                            |
| Manuscript ID                 | bmjopen-2020-037643                                                                                                                                                                                                                                                                                                                                                                                                                                                                                                                                                                                                                                                                                                                                                                                                                                                                                                                                                                                                                                                        |
| Article Type:                 | Protocol                                                                                                                                                                                                                                                                                                                                                                                                                                                                                                                                                                                                                                                                                                                                                                                                                                                                                                                                                                                                                                                                   |
| Date Submitted by the Author: | 11-Feb-2020                                                                                                                                                                                                                                                                                                                                                                                                                                                                                                                                                                                                                                                                                                                                                                                                                                                                                                                                                                                                                                                                |
| Complete List of Authors:     | Soobiah, Charlene ; Women's College Hospital, Women's College Hospital Institute for Health System Solutions and Virtual Care<br>Cooper, Madeline; Women's College Hospital, Women's College Hospital Institute for Health System Solutions and Virtual Care<br>Kishimoto, Vanessa; Women's College Hospital, Institute for Health System Solutions and Virtual Care<br>Bhatia, R.; Women's College Hospital, Institute for Health System Solutions and Virtual Care<br>Scott, Ted; Hamilton Health Sciences; McMaster University<br>Maloney, Shelagh; Canada Health Infoway<br>Larsen, Darren; Women's College Hospital, Institute for Health System Solutions and Virtual Care; OntarioMD<br>Wijeysundera, Harindra; Sunnybrook Health Sciences Centre, Zelmer, Jennifer; Canadian Foundation for Healthcare Improvement<br>SteeleGray, Carolyn; Sinai Health System, Bridgepoint Collaboratory for Research and Innovation, Lunenfeld-Tanenbaum Research Institute<br>Desveaux, Laura; Women's College Hospital, Institute for Health System Solutions and Virtual Care |
| Keywords:                     | Protocols & guidelines < HEALTH SERVICES ADMINISTRATION & MANAGEMENT, Quality in health care < HEALTH SERVICES ADMINISTRATION & MANAGEMENT, STATISTICS & RESEARCH METHODS                                                                                                                                                                                                                                                                                                                                                                                                                                                                                                                                                                                                                                                                                                                                                                                                                                                                                                  |
|                               |                                                                                                                                                                                                                                                                                                                                                                                                                                                                                                                                                                                                                                                                                                                                                                                                                                                                                                                                                                                                                                                                            |

SCHOLARONE™  
Manuscripts

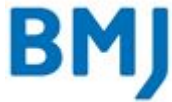

I, the Submitting Author has the right to grant and does grant on behalf of all authors of the Work (as defined in the below author licence), an exclusive licence and/or a non-exclusive licence for contributions from authors who are: i) UK Crown employees; ii) where BMJ has agreed a CC-BY licence shall apply, and/or iii) in accordance with the terms applicable for US Federal Government officers or employees acting as part of their official duties; on a worldwide, perpetual, irrevocable, royalty-free basis to BMJ Publishing Group Ltd ("BMJ") its licensees and where the relevant Journal is co-owned by BMJ to the co-owners of the Journal, to publish the Work in this journal and any other BMJ products and to exploit all rights, as set out in our [licence](#).

The Submitting Author accepts and understands that any supply made under these terms is made by BMJ to the Submitting Author unless you are acting as an employee on behalf of your employer or a postgraduate student of an affiliated institution which is paying any applicable article publishing charge ("APC") for Open Access articles. Where the Submitting Author wishes to make the Work available on an Open Access basis (and intends to pay the relevant APC), the terms of reuse of such Open Access shall be governed by a Creative Commons licence – details of these licences and which [Creative Commons](#) licence will apply to this Work are set out in our licence referred to above.

Other than as permitted in any relevant BMJ Author's Self Archiving Policies, I confirm this Work has not been accepted for publication elsewhere, is not being considered for publication elsewhere and does not duplicate material already published. I confirm all authors consent to publication of this Work and authorise the granting of this licence.

1  
2  
3 **Identifying optimal frameworks to implement or evaluate digital health interventions: A**  
4 **scoping review protocol**  
5  
6  
7  
8

9 Charlene Soobiah<sup>1,2</sup>, Madeline Cooper<sup>1</sup>, Vanessa Kishimoto<sup>1</sup>, R. Sacha Bhatia<sup>1</sup>, Ted Scott<sup>3,4</sup>,  
10 Shelagh Maloney<sup>5</sup>, Darren Larsen<sup>1,6</sup>, Harindra C. Wijeyesundera<sup>7</sup>, Jennifer Zelmer<sup>8</sup>, Carolyn  
11 Steele Grey<sup>2,9</sup>, Laura Desveaux<sup>1,2\*</sup>  
12  
13  
14  
15

16  
17  
18 Affiliations:  
19

20 1 Women's College Hospital Institute for Health System Solutions and Virtual Care, 76  
21 Grenville Street, Toronto ON M5S 1B2  
22

23 2 University of Toronto Institute of Health Policy Management & Evaluation, 155 College,  
24 Toronto, ON M5T 3M6  
25

26 3 Hamilton Health Sciences, King West, 293 Wellington, Suite 120, Hamilton ON, L8L 8E7  
27

28 4 McMaster University School of Nursing, 1280 Main St West, Hamilton ON, L8L 8E7  
29

30 5 Canada Health Infoway, 150 King Street West, Suite 1300 Toronto, ON M5H 1J9  
31

32 6 Ontario MD, 150 Bloor St. West, Suite 900, Toronto, ON M5S 3C1  
33

34 7 Schulich Heart Center, Sunnybrook Health Sciences Centre, 2075 Bayview Avenue, Toronto,  
35 ON M4N 3M5  
36

37 8 Canadian Foundation for Healthcare Improvement, 150 Kent Street, Suite 200, Ottawa ON,  
38 K1P 0E4  
39

40 9 Bridgepoint Collaboratory for Research and Innovation, Lunenfeld-Tanenbaum Research  
41 Institute, Sinai Health System 1 Bridgepoint Dr. Toronto, ON M4M 2B5  
42

43 **\*Corresponding author:** Dr. Laura Desveaux, [laura.desveaux@wchospital.ca](mailto:laura.desveaux@wchospital.ca), 416-323-6400  
44 x4302, 76 Grenville Street Toronto, Ont. M5S 1B2  
45  
46  
47  
48  
49  
50  
51  
52  
53  
54  
55  
56  
57  
58  
59  
60

1  
2  
3  
4  
5  
6  
7  
8  
9  
10  
11  
12  
13  
14  
15  
16  
17  
18  
19  
20  
21  
22  
23  
24  
25  
26  
27  
28  
29  
30  
31  
32  
33  
34  
35  
36  
37  
38  
39  
40  
41  
42  
43  
44  
45  
46  
47  
48  
49  
50  
51  
52  
53  
54  
55  
56  
57  
58  
59  
60

**Keywords:** scoping review, digital health interventions, evaluation frameworks, implementation frameworks,

**Word count:** 2019 (main text), 274 (abstract)

For peer review only

## Abstract

**Introduction:** Digital health interventions (DHIs) are increasingly popular in healthcare. DHIs involve complex interactions between user, technology and the healthcare team, posing challenges for implementation and evaluation. Theoretical or interpretive frameworks are crucial in providing researchers guidance and clarity on implementation and evaluation approaches; however, there is a lack of standardization on which frameworks to use in which contexts. Our goal is to conduct a scoping review to identify frameworks to guide the implementation or evaluation of DHIs.

**Methods and Analysis:** We will conduct a scoping review using methods outlined by the Joanna Briggs Institute Reviewers' Manual and will conform to the PRISMA Extension for Scoping Reviews. Studies will be included if they report on frameworks (i.e., theoretical, interpretive, developmental) that are used to guide either implementation or evaluation of DHIs. Electronic databases, including MEDLINE, EMBASE, CINAHL, and PsychINFO will be searched in addition to grey literature and reference lists of included studies. Citations and full text articles will be screened independently and in duplicate in Covidence after a reliability check among reviewers. We will use qualitative description to summarize findings, and focus on how research objectives and type of DHI are aligned with the frameworks used.

**Ethics and dissemination:** We will employ an integrated knowledge translation approach and establish a digital health knowledge user panel to provide input at strategic stages of the scoping review. Specifically, they will provide feedback on the eligibility criteria, data abstraction elements, interpretation of findings and assist in developing key messages for dissemination. This study does not require ethical review. Findings from this review will provide practical guidance on frameworks to guide the implementation or evaluation of DHIs.

### Strengths and Limitations

- Frameworks are crucial in providing researchers guidance and clarity on implementation and evaluation approaches; however, there is a lack of standardization on which frameworks to use for digital health interventions.
- A comprehensive scoping review is detailed
- Findings will provide practical guidance for researchers, clinicians, policymakers and developers of digital health interventions on selecting optimal for implementation or evaluation of digital health interventions

## Introduction

Frameworks help to systematically organize and link research objectives or constructs, and provide useful insights in quantitative and qualitative analyses, which can inform interpretation or decision-making. A plethora of frameworks exist,<sup>2,3</sup> with over 159 created to guide implementation and evaluation of healthcare interventions.<sup>4</sup> This is likely due, in part, to the reality that framework often vary based on specific aspects of implementation or evaluation and are often tailored to a specific clinical area.<sup>2</sup> The Medical Research Council (MRC) categorizes frameworks into four distinct groups: 1) development frameworks, which can model processes and outcomes; 2) feasibility frameworks, which can guide pilot testing of an intervention; 3) implementation frameworks to guide evidence into clinical practice; and 4) evaluation frameworks, to determine intervention effectiveness.<sup>1</sup> Implementation and evaluation frameworks present an opportunity to address gaps relating not only to whether an intervention works, but provide actionable insights for how to support their uptake in practice.

Digital health interventions (DHIs) differ from traditional health interventions such as implementing a new program or evaluating drug effectiveness. DHIs include any health service or treatment delivered using technology that aims to facilitate, capture, or exchange knowledge.<sup>5</sup> Examples of DHIs include electronic medical records, mobile applications or wearable sensors for remote monitoring. DHIs are complex, differ both in intended functionality (e.g., self-management support versus data sharing), and intended users (e.g., patients versus providers). DHIs are not static; instead the interaction between the technology, end-user and the healthcare team and setting is by its nature dynamic and thus can vary substantially over time.<sup>6</sup> Given this, implementing or evaluating DHIs is challenging. Accordingly, frameworks may help guide researchers, clinicians, policymakers, and developers of DHIs in such activities; however, there is a lack of standardization in DHIs and it is unclear which frameworks should be used for implementation or evaluation.

This paper outlines a protocol for a scoping review to identify frameworks to guide the implementation or evaluation of DHIs. Specifically, our objectives are to:

1. Identify frameworks designed to guide the implementation or evaluation of DHIs.
2. Identify the proposed role of each framework, including the constructs they target.
3. Describe how each framework has been applied in primary studies, if applicable.



1  
2  
3 The results of this review will provide practical guidance to researchers, organizations, policy  
4 makers and developers interested in implementing or evaluating DHIs.  
5  
6

## 7 **Methods and Analysis**

### 8

9  
10 We will conduct a scoping review to comprehensively search the literature, ‘map’ the  
11 evidence, and identify gaps in the research knowledge base.<sup>7 8</sup> The study will be conducted using  
12 established methods outlined by the Joanna Briggs Institute Reviewers’ Manual<sup>7</sup> and reporting  
13 will conform to the PRISMA Extension for Scoping Reviews (PRISMA-ScR).<sup>9</sup> Our protocol is  
14 registered on Open Science Framework (OSF) and is available at (<https://osf.io/8jydm/>).  
15  
16  
17

### 18 **Eligibility Criteria**

#### 19

20  
21 Studies reporting on the development or application of frameworks (i.e., theoretical or  
22 interpretive) to guide implementation or evaluation of DHIs in healthcare will be included.  
23 Implementation frameworks will be operationalized according to MRC guidance, as frameworks  
24 that aim to guide research into practice, which can include development, feasibility, and  
25 dissemination frameworks.<sup>1</sup> Evaluation frameworks will be defined as frameworks that focus on  
26 determining the effectiveness of DHIs, which includes measuring outcomes and understanding  
27 processes or mechanisms of action.<sup>1</sup> No limitations will be placed on user population, comparators,  
28 study design, publication status or geographic region. Conference abstracts/proceedings and white  
29 papers will be included. We will include studies reported in other languages and use appropriate  
30 tools (i.e., Google translate, translation services, contact author) to assess inclusion. Commentaries  
31 and studies examining mathematical or statistical frameworks will be excluded.  
32  
33  
34  
35  
36  
37  
38  
39  
40

### 41 **Information sources**

#### 42

43 An experienced information specialist developed the literature search in consultation with  
44 the multidisciplinary research team. The search will be peer reviewed by a second information  
45 specialist using the Peer Review of Electronic Search Strategy (PRESS) checklist to ensure the  
46 search is comprehensive and maximizes appropriate search terms.<sup>10</sup>  
47  
48  
49  
50

51 We will search MEDLINE, EMBASE, CINAHL, and PsychINFO using key words such  
52 as ‘digital health’ and ‘framework’. The databases will be searched from inception to present and  
53 the search strategy is presented in Appendix 1. We chose not to use the BeHEMoTh (behaviour of  
54  
55  
56  
57  
58  
59  
60

1  
2  
3 interest, health context, exclusions, and models or theory) approach<sup>11</sup> as specified in our OSF  
4 registration. Although this approach has been successful in identifying frameworks in knowledge  
5 translation,<sup>4</sup> it did not prove to be a feasible approach in our scoping review as it yielded a vast  
6 number of citations with limited specificity related to our objectives. We utilized a simplified  
7 heuristic, which included identifying DHIs in various healthcare contexts, adding terms for  
8 frameworks, and removing exclusions such as animal studies (Appendix 1).  
9

10  
11  
12  
13  
14 The search strategy will be supplemented by a search for grey literature using the checklist  
15 suggested by the Canadian Agency for Drugs and Technologies in Health (CADTH).<sup>12</sup>  
16 Specifically, we will search for white papers or benefit evaluation studies through Health  
17 Technology Assessment Agencies such as Agency for Healthcare Research and Quality (AHRQ)  
18 and National Institute for Health and Care Excellence (NICE), Canada Infoway and other relevant  
19 organizations involved in providing guidance on delivery of healthcare services. We will also scan  
20 reference lists of included studies and conduct a forward citation search (i.e., examine studies that  
21 reference included studies) to ensure our approach is comprehensive.  
22  
23  
24  
25  
26  
27

### 28 **Eligibility Screening Process**

29  
30  
31 Citations obtained from the literature search will be uploaded to Covidence,<sup>13</sup> a systematic  
32 review software program which organizes citations, enables screening of citations by multiple  
33 reviewers, and identifies discrepancies. We will apply a two-step process for identifying relevant  
34 citations. At level 1, titles and abstracts will be assessed using the eligibility criteria (Appendix 2).  
35 Studies with abstracts fulfilling criteria will be passed to level 2 where the eligibility criteria will  
36 be applied to the full text articles.  
37  
38  
39  
40  
41

42 Prior to screening, a pilot test will be completed using a random sample of citations or full  
43 text, with the expressed purpose of assessing agreement between reviewers at each level.  
44 Specifically, percent agreement will be used to assess agreement among reviewers (inter-rater  
45 reliability  $\geq 80\%$  will be considered adequate). A third reviewer will mediate any disagreements.  
46 Citations and full text articles will be screened in duplicate by two reviewers.  
47  
48  
49  
50

### 51 **Data items and abstraction process**

52  
53  
54 Studies fulfilling the eligibility criteria will be abstracted in Excel. We will extract the  
55 following study characteristics for the identified frameworks: name, reference, theory associated  
56  
57  
58  
59  
60

1  
2  
3 with framework (if applicable), description of its components or constructs, and its application in  
4 research (or stage of research to which it was applied, if applicable). For studies outlining the  
5 application of a framework, additional characteristics will be abstracted such as the type of DHI,  
6 healthcare setting, method of application, and nature and directionality of the results. We will  
7 abstract information such as name of the framework, the role of framework in study (i.e.,  
8 development, feasibility/pilot testing, implementation, evaluation), components of the framework  
9 that were utilized, type of DHI, the objective of the study (if applicable), and healthcare setting  
10 from included studies.  
11  
12  
13  
14  
15  
16

### 17 **Methodological appraisal**

18  
19  
20 We will not assess the quality of included articles in the scoping review (consistent with  
21 Joanna Briggs Institute Reviewer's Manual<sup>7</sup>) as our purpose is to gain an overview of frameworks  
22 used in relation to DHIs and not to assess the quality of their application.  
23  
24  
25

### 26 **Ethics and Dissemination**

27  
28 This scoping review is focused on published reports and studies of DHI and does not  
29 involve patients; as such, no formal ethics approval is required.  
30  
31

32 To facilitate uptake and dissemination of findings, we will employ an integrated knowledge  
33 translation strategy to ensure our findings meet the needs of various knowledge users, defined as  
34 individuals who are likely to use the information from the review to make an informed health  
35 decision.<sup>3</sup> We established a panel of digital health knowledge users, *a priori*, who will provide  
36 input at strategic stages of the scoping review, including study design, interpretation of results, and  
37 communication of findings. Specifically, digital health knowledge users will help refine inclusion  
38 and exclusion criteria, prioritize selection of data abstraction elements, assist in interpretation and  
39 help develop dissemination strategies for communication of findings stemming from the review.  
40 Digital health knowledge users will include senior leaders at organizations that promote or support  
41 implementation of digital health solutions, and researchers focused on evaluating DHIs. Digital  
42 health knowledge users will have national and international networks that will help to ensure the  
43 review reflects the knowledge needs of a diverse audience, which is directly in line with the stated  
44 aim of providing practical guidance on the selection and application of frameworks for DHIs.  
45  
46  
47  
48  
49  
50  
51  
52  
53  
54

### 55 **Patient and Public Involvement**

1  
2  
3 No patients are involved.  
4

## 5 **Analysis**

6  
7  
8 Included studies will be summarized using qualitative description, an approach that seeks  
9 to create an understanding of phenomenon through accessing the meanings ascribed by authors.<sup>14</sup>  
10 Descriptions of individual frameworks will be organized by key categories, including study design,  
11 report type (published vs non-published), methodological approach (i.e. how the framework is  
12 intended to be applied) and application papers (i.e. how the framework has been applied in  
13 practice). We will then synthesize findings by mapping core components of the frameworks and  
14 examining how research objectives and type of DHI are linked to the framework. Categorization  
15 will use language directly from included studies, where possible, and authors will be contacted  
16 when information is not present or unclear. Digital health knowledge users will guide the synthesis  
17 of findings by providing input on the level of detail abstracted from included articles and provide  
18 input on categorization of frameworks, where appropriate.  
19  
20  
21  
22  
23  
24  
25  
26

## 27 **Strengths and Limitations**

28  
29  
30 To our knowledge, this is the first scoping review to examine the use of frameworks to  
31 guide implementation or evaluation of DHIs. A clear understanding of which frameworks can be  
32 used for the different phases of a research study will provide practical guidance for researchers,  
33 clinicians, policymakers and developers in implementing or determining effectiveness of DHIs.  
34  
35  
36

37  
38 Given the breadth of this scoping review, we anticipate a few key challenges. The first  
39 relates to the inconsistent and often ill-defined nature of DHIs and frameworks. To be inclusive,  
40 we have defined DHIs broadly as any health intervention that can be delivered through technology  
41 to ensure we capture frameworks that are currently being used across healthcare settings.  
42 Moreover, the term framework also create challenges, as we have defined as a tool to  
43 systematically organize and link research questions or constructs, but a range of terms are often  
44 used synonymously (e.g., models or processes). To account for this, we will include studies  
45 reporting on 'models' and work closely with the digital health knowledge user panel to confirm  
46 whether the reported framework aligns with our *a priori* definition. Relatedly, authors may not  
47 provide sufficient details on the frameworks they utilize or their method of application. To mitigate  
48 this, we will contact authors to obtain additional information whenever information is missing or  
49  
50  
51  
52  
53  
54  
55  
56  
57  
58  
59  
60

1  
2  
3 unclear. Finally, we anticipate that some included frameworks will have a dual purpose of  
4 addressing implementation and evaluation, or may contain components that lend themselves to  
5 both constructs. When this occurs, we will discuss the overlap with digital health knowledge users  
6 and devise the most appropriate plan for analysis.  
7  
8  
9

10  
11 We also anticipate challenges searching the literature. DHIs are not well defined in  
12 electronic databases as they are referenced using a plethora of key terms. As such, we have  
13 constructed our search in an attempt to balance comprehensiveness and specificity. We have  
14 worked closely with an information specialist to ensure the number of citations are focused and  
15 feasible. Several iterations of the literature search were conducted using a randomized sample of  
16 200 citations and the specificity and sensitivity of search terms were tested using the inclusion  
17 criteria. Two reviewers screened citations, discrepancies were discussed among the internal  
18 research team, and the number of included studies were examined to examine the specificity of  
19 search terms. Through iterative testing, we feel confident in our current literature strategy,  
20 however, additional challenges may arise when screening.  
21  
22  
23  
24  
25  
26  
27

28  
29 Overall, identification of frameworks will serve as a guide for researchers, clinicians,  
30 policymakers and developers of DHIs by providing practical guidance on which frameworks may  
31 be most appropriate for which objectives (i.e., implementation or evaluation). In parallel, the  
32 results will contribute to a more nuanced understanding of how to evaluate and implement DHIs,  
33 including the identification and understanding of key constructs.  
34  
35  
36  
37  
38  
39  
40  
41  
42  
43  
44  
45  
46  
47  
48  
49  
50  
51  
52  
53  
54  
55  
56  
57  
58  
59  
60

## References:

1. Craig P, Dieppe P, Macintyre S, et al. Developing and evaluating complex interventions: the new Medical Research Council guidance. *International journal of nursing studies* 2013;50(5):587-92. doi: 10.1016/j.ijnurstu.2012.09.010
2. Tabak RG, Khoong EC, Chambers DA, et al. Bridging research and practice: models for dissemination and implementation research. *Am J Prev Med* 2012;43(3):337-50. doi: 10.1016/j.amepre.2012.05.024 [published Online First: 2012/08/18]
3. Straus S, Tetroe, J., Graham, ID., Knowledge Translation in Health Care: Moving from Evidence to Practice 2014.
4. Strifler L, Cardoso R, McGowan J, et al. Scoping review identifies significant number of knowledge translation theories, models, and frameworks with limited use. *J Clin Epidemiol* 2018;100:92-102. doi: 10.1016/j.jclinepi.2018.04.008 [published Online First: 2018/04/17]
5. Murray E, Hekler EB, Andersson G, et al. Evaluating Digital Health Interventions: Key Questions and Approaches. *Am J Prev Med* 2016;51(5):843-51. doi: 10.1016/j.amepre.2016.06.008 [published Online First: 2016/10/18]
6. Shaw J. AP, Desveaux L., Conejo Palma D., Stamenova V., Jamieson T., Yang R., Bhatia RS., Bhattacharyya O., . Beyond "implementation": digital health innovation and service design. *NPJ Digital Medicine* 2018;1:48.
7. Aromataris E. MZ, editor. *Joanna Briggs Institute Reviewer's Manual*. The Joanna Briggs Institute, 2017.
8. Arksey H, O'Malley, L. Scoping studies: towards a methodological framework. *International Journal of Social Research Methodology* 2005;8(1):19-32.
9. Tricco AC, Lillie E, Zarin W, et al. PRISMA Extension for Scoping Reviews (PRISMA-ScR): Checklist and Explanation. *Ann Intern Med* 2018;169(7):467-73. doi: 10.7326/M18-0850 [published Online First: 2018/09/05]
10. McGowan J, Sampson M, Salzwedel DM, et al. PRESS Peer Review of Electronic Search Strategies: 2015 Guideline Statement. *J Clin Epidemiol* 2016;75:40-6. doi: 10.1016/j.jclinepi.2016.01.021 [published Online First: 2016/03/24]
11. Booth A, Carroll C. Systematic searching for theory to inform systematic reviews: is it feasible? Is it desirable? *Health Info Libr J* 2015;32(3):220-35. doi: 10.1111/hir.12108 [published Online First: 2015/06/23]
12. Canadian Agency for Drugs and Technologies in Health (CADTH). Grey Matters: A practical search tool for evidence-based medicine. 2013 [Available from: <http://www.cadth.ca/resources/grey-matters>].
13. Covidence. 2019 [Available from: <https://www.covidence.org/home>].
14. Sandelowski M. What's in a name? Qualitative description revisited. *Research in Nursing Health* 2010;33(1):77-84.

1  
2  
3 **1 Authors' Contributions:**  
4

5 2 CS, LD conceived and developed the study. CS drafted the manuscript. MC, VK, RSB, TH, SM,  
6  
7 3 DI, HCW, JZ, CGS, and LD reviewed and edited the manuscript.  
8

9  
10 **4 Funding:**  
11

12 5 This research received no specific grant from any funding agency in the public, commercial or  
13 6 not-for-profit sectors.  
14

15 **7 Conflict of Interest:**  
16

17 8 The authors have no conflicts of interest to report.  
18  
19

20 **9 Acknowledgement:**  
21

22 10 We would like to thank Becky Skidmore, and Anne Dabrowski for their assistance with  
23  
24 11 generating the literature search, as well as Beatrice Choremis, who helped screen a few  
25  
26 12 preliminary citations.  
27  
28  
29  
30  
31  
32  
33  
34  
35  
36  
37  
38  
39  
40  
41  
42  
43  
44  
45  
46  
47  
48  
49  
50  
51  
52  
53  
54  
55  
56  
57  
58  
59  
60

For peer review only

1  
2  
3  
4  
5  
6  
7  
8  
9  
10  
11  
12  
13  
14  
15  
16  
17  
18  
19  
20  
21  
22  
23  
24  
25  
26  
27  
28  
29  
30  
31  
32  
33  
34  
35  
36  
37  
38  
39  
40  
41  
42  
43  
44  
45  
46  
47  
48  
49  
50  
51  
52  
53  
54  
55  
56  
57  
58  
59  
60



## Appendix 1. Primary Literature Search in Medline

Database: Ovid MEDLINE: Epub Ahead of Print, In-Process & Other Non-Indexed Citations, Ovid MEDLINE® Daily and Ovid MEDLINE® <1946-Present>

Search Strategy:

- 
- 1 exp Telemedicine/ (25845)
  - 2 (telemed\* or tele-med\* or telecare or tele-care or teleconsult\* or tele-consult\* or telehealth\* or tele-health\* or telemonitor\* or tele-monitor\* or telerehab\* or tele-rehab\*).tw,kf. (17416)
  - 3 (ehealth\* or e-health\* or mhealth\* or m-health\* or emental health\* or e-mental health\* or epsychiatr\* or e-psychiatr\* or epsychol\* or e-psychol\* or etherap\* or e-therap\*).tw,kf. (10073)
  - 4 (emedicine or e-medicine\*).tw,kf. (78)
  - 5 (mobile health\* or mobile care or mobile medicine).tw,kf. (3793)
  - 6 (digital\* adj3 (medic\* or care or health\* or healthcare or health-care)).tw,kf. (3065)
  - 7 (digital\* adj3 (consult\* or diagnos\* or intervention? or manag\* or monitor\* or palliat\* or rehab\* or surger\* or surgic\* or therap\* or treatment?)).tw,kf. (5936)
  - 8 (remote\* adj3 (consult\* or diagnos\* or intervention? or manag\* or monitor\* or palliat\* or rehab\* or surger\* or surgic\* or therap\* or treatment?)).tw,kf. (6643)
  - 9 Monitoring, Ambulatory/ (7806)
  - 10 ((outpatient\* or out-patient\* or ambulator\* or home? or homebased or home-based) adj3 (manag\* or monitor\*)).tw,kf. (24341)
  - 11 exp Biomedical Technology/ (13203)
  - 12 ((biomedic\* or bio-medic\* or health\* or healthcare or health care or medical) adj technolog\*).tw,kf. (13535)
  - 13 Medical Informatics/ or Medical Informatics Applications/ (13622)
  - 14 ((health\* or medical) adj informatic\*).tw,kf. (5056)
  - 15 exp Therapy, Computer-Assisted/ (59720)
  - 16 ((internet\* or app or apps or computer\* or cyber\* or digital\* or e-application? or e-mail\* or email\* or electronic mail\* or iphone? or i-phone? or (mobile adj2 application?) or mobile-based or mobile phone? or online or smarthome\* or smart-home\* or smartphone\* or smart phone\* or technolog\* or webbased or web-based or webdeliver\* or web-deliver\* or "web 2.0") adj3 care).tw,kf. (8049)
  - 17 ((internet\* or app or apps or computer\* or cyber\* or digital\* or e-application? or e-mail\* or email\* or electronic mail\* or iphone? or i-phone? or (mobile adj2 application?) or mobile-based or mobile phone? or online or smarthome\* or smart-home\* or smartphone\* or smart phone\* or technolog\* or webbased or web-based or webdeliver\* or web-deliver\* or "web 2.0") adj3 health\*).tw,kf. (27319)
  - 18 ((internet\* or app or apps or computer\* or cyber\* or digital\* or e-application? or e-mail\* or email\* or electronic mail\* or iphone? or i-phone? or (mobile adj2 application?) or mobile-based or mobile phone? or online or smarthome\* or smart-home\* or smartphone\* or smart phone\* or technolog\* or webbased or web-based or webdeliver\* or web-deliver\* or "web 2.0") adj3 (healthcare or health care)).tw,kf. (6410)
  - 19 ((internet\* or app or apps or computer\* or cyber\* or digital\* or e-application? or e-mail\* or email\* or electronic mail\* or iphone? or i-phone? or (mobile adj2 application?) or mobile-based or mobile phone? or online or smarthome\* or smart-home\* or smartphone\* or smart phone\* or technolog\* or webbased or web-based or webdeliver\* or web-deliver\* or "web 2.0") adj3 (medicine or medical)).tw,kf. (19800)
  - 20 ((internet\* or app or apps or computer\* or cyber\* or digital\* or e-application? or e-mail\* or email\* or electronic mail\* or iphone? or i-phone? or (mobile adj2 application?) or mobile-based or mobile

1  
2  
3 phone? or online or smarthome\* or smart-home\* or smartphone\* or smart phone\* or technolog\* or  
4 webbased or web-based or webdeliver\* or web-deliver\* or "web 2.0" adj3 consult\*).tw,kf. (1299)  
5 21 ((internet\* or app or apps or computer\* or cyber\* or digital\* or e-application? or e-mail\* or email\*  
6 or electronic mail\* or iphone? or i-phone? or (mobile adj2 application?) or mobile-based or mobile  
7 phone? or online or smarthome\* or smart-home\* or smartphone\* or smart phone\* or technolog\* or  
8 webbased or web-based or webdeliver\* or web-deliver\* or "web 2.0" adj3 diagnos\*).tw,kf. (13043)  
9 22 ((internet\* or app or apps or computer\* or cyber\* or digital\* or e-application? or e-mail\* or email\*  
10 or electronic mail\* or iphone? or i-phone? or (mobile adj2 application?) or mobile-based or mobile  
11 phone? or online or smarthome\* or smart-home\* or smartphone\* or smart phone\* or technolog\* or  
12 webbased or web-based or webdeliver\* or web-deliver\* or "web 2.0" adj3 intervention?).tw,kf. (9139)  
13 23 ((internet\* or app or apps or computer\* or cyber\* or digital\* or e-application? or e-mail\* or email\*  
14 or electronic mail\* or iphone? or i-phone? or (mobile adj2 application?) or mobile-based or mobile  
15 phone? or online or smarthome\* or smart-home\* or smartphone\* or smart phone\* or technolog\* or  
16 webbased or web-based or webdeliver\* or web-deliver\* or "web 2.0" adj3 manag\*).tw,kf. (7259)  
17 24 ((internet\* or app or apps or computer\* or cyber\* or digital\* or e-application? or e-mail\* or email\*  
18 or electronic mail\* or iphone? or i-phone? or (mobile adj2 application?) or mobile-based or mobile  
19 phone? or online or smarthome\* or smart-home\* or smartphone\* or smart phone\* or technolog\* or  
20 webbased or web-based or webdeliver\* or web-deliver\* or "web 2.0" adj3 monitor\*).tw,kf. (8457)  
21 25 ((internet\* or app or apps or computer\* or cyber\* or digital\* or e-application? or e-mail\* or email\*  
22 or electronic mail\* or iphone? or i-phone? or (mobile adj2 application?) or mobile-based or mobile  
23 phone? or online or smarthome\* or smart-home\* or smartphone\* or smart phone\* or technolog\* or  
24 webbased or web-based or webdeliver\* or web-deliver\* or "web 2.0" adj3 palliat\*).tw,kf. (133)  
25 26 ((internet\* or app or apps or computer\* or cyber\* or digital\* or e-application? or e-mail\* or email\*  
26 or electronic mail\* or iphone? or i-phone? or (mobile adj2 application?) or mobile-based or mobile  
27 phone? or online or smarthome\* or smart-home\* or smartphone\* or smart phone\* or technolog\* or  
28 webbased or web-based or webdeliver\* or web-deliver\* or "web 2.0" adj3 rehab\*).tw,kf. (1264)  
29 27 ((internet\* or app or apps or computer\* or cyber\* or digital\* or e-application? or e-mail\* or email\*  
30 or electronic mail\* or iphone? or i-phone? or (mobile adj2 application?) or mobile-based or mobile  
31 phone? or online or smarthome\* or smart-home\* or smartphone\* or smart phone\* or technolog\* or  
32 webbased or web-based or webdeliver\* or web-deliver\* or "web 2.0" adj3 (surger\* or surgic\*).tw,kf.  
33 (7354)  
34 28 ((internet\* or app or apps or computer\* or cyber\* or digital\* or e-application? or e-mail\* or email\*  
35 or electronic mail\* or iphone? or i-phone? or (mobile adj2 application?) or mobile-based or mobile  
36 phone? or online or smarthome\* or smart-home\* or smartphone\* or smart phone\* or technolog\* or  
37 webbased or web-based or webdeliver\* or web-deliver\* or "web 2.0" adj3 therap\*).tw,kf. (6817)  
38 29 ((internet\* or app or apps or computer\* or cyber\* or digital\* or e-application? or e-mail\* or email\*  
39 or electronic mail\* or iphone? or i-phone? or (mobile adj2 application?) or mobile-based or mobile  
40 phone? or online or smarthome\* or smart-home\* or smartphone\* or smart phone\* or technolog\* or  
41 webbased or web-based or webdeliver\* or web-deliver\* or "web 2.0" adj3 treatment?).tw,kf. (10336)  
42 30 Wearable Electronic Devices/ (1321)  
43 31 wearable?.tw,kf. (10007)  
44 32 or/1-31 (253918)  
45 33 exp \*Delivery of Health Care/ (619520)  
46 34 exp Computers/ (76307)  
47 35 Electronic Mail/ (2573)  
48 36 Internet/ (69753)  
49 37 Telecommunications/ (4741)  
50  
51  
52  
53  
54  
55  
56  
57  
58  
59  
60

1  
2  
3 38 (internet\* or app or apps or computer\* or cyber\* or digital\* or e-application? or e-mail\* or email\*  
4 or electronic mail\* or iphone? or i-phone? or (mobile adj2 application?) or mobile-based or mobile  
5 phone? or online or smarthome\* or smart-home\* or smartphone\* or smart phone\* or technolog\* or  
6 webbased or web-based or webdeliver\* or web-deliver\*).tw,kf. (995758)  
7  
8 39 33 and (34 or 35 or 36 or 37 or 38) (50511)  
9 40 32 or 39 [DIGITAL HEALTH APPLICATIONS] (282776)  
10 41 (evaluat\* adj3 (design\* or frame or frames or framework? or guid\* or model or models or schem\*  
11 or strateg\* or theor\*)).tw,kf. (105535)  
12 42 (apprais\* adj3 (frame or frames or framework? or model or models or theor\*)).tw,kf. (927)  
13 43 (apprais\* adj3 (design\* or guid\* or schem\* or strateg\*)).ti,kf. (313)  
14 44 (assess\* adj3 (frame or frames or framework? or model or models or theor\*)).tw,kf. (47798)  
15 45 (assess\* adj3 (design\* or guid\* or schem\* or strateg\*)).ti,kf. (3366)  
16 46 (implement\* adj3 (design\* or frame or frames or framework? or guid\* or model or models or  
17 schem\* or strateg\* or theor\*)).tw,kf. (57152)  
18  
19 47 (evidence-based adj (frame or frames or framework? or model or models or theor\*)).tw,kf. (769)  
20 48 (evidence-based adj (design\* or guid\* or schem\* or strateg\*)).ti,kf. (1559)  
21 49 (service adj (frame or frames or framework? or model or models or theor\*)).tw,kf. (2165)  
22 50 (service adj (design\* or guid\* or schem\* or strateg\*)).ti,kf. (201)  
23 51 or/41-50 [EVALUATION/IMPLEMENTATION FRAMEWORKS] (212588)  
24 52 40 and 51 [DIGITAL HEALTH - EVALUATION/IMPLEMENTATION FRAMEWORKS] (8974)  
25 53 exp Animals/ not Humans/ (4614915)  
26 54 52 not 53 [ANIMAL-ONLY REMOVED] (8859)  
27  
28

29 \*\*\*\*\*  
30  
31  
32  
33  
34  
35  
36  
37  
38  
39  
40  
41  
42  
43  
44  
45  
46  
47  
48  
49  
50  
51  
52  
53  
54  
55  
56  
57  
58  
59  
60

## Appendix 2. Eligibility Criteria

### Question 1: Does this study include humans?

- a. If yes, **INCLUDE**
- b. **EXCLUDE** animal studies/models, non-humans or vertebrae studies

### Question 2: Does this study examine the use of a digital health intervention?

- a. **INCLUDE** studies focusing on digital health interventions as their primary component of the study. A digital health intervention is any health intervention that is being delivered by technology and can include the following items: ehealth, virtual healthcare, smartphone apps aimed at healthcare issue, wearable technologies, telemedicine or health education interventions delivered digitally.
- b. **EXCLUDE** interventions that are focused on creating scales, checklists or other metrics that are not a digital health intervention.
  - Example of an exclude: a cross-sectional study to create a checklist for conducting health technology assessments.

### Question 3: Does this study use a framework to implement or evaluate the digital intervention?

- a. **INCLUDE** studies that focus on frameworks. Frameworks can help guide evaluation questions by systematically organizing and linking research questions when evaluating a digital intervention.
- b. **EXCLUDE** studies that discuss checklists, theoretical mathematical models or statistical models.

### Question 4: Is this an experimental study, qualitative study, or review?

- a. **INCLUDE** any study design (i.e., randomized controlled trials, observational studies, cross-sectional studies, qualitative studies, systematic review)
- b. **EXCLUDE** studies if it's an editorial (without any primary data), letter to the editor or commentary.

# BMJ Open

## Identifying optimal frameworks to implement or evaluate digital health interventions: A scoping review protocol

|                                 |                                                                                                                                                                                                                                                                                                                                                                                                                                                                                                                                                                                                                                                                                                                                                                                                                                                                                                                                                                                                                                                                             |
|---------------------------------|-----------------------------------------------------------------------------------------------------------------------------------------------------------------------------------------------------------------------------------------------------------------------------------------------------------------------------------------------------------------------------------------------------------------------------------------------------------------------------------------------------------------------------------------------------------------------------------------------------------------------------------------------------------------------------------------------------------------------------------------------------------------------------------------------------------------------------------------------------------------------------------------------------------------------------------------------------------------------------------------------------------------------------------------------------------------------------|
| Journal:                        | <i>BMJ Open</i>                                                                                                                                                                                                                                                                                                                                                                                                                                                                                                                                                                                                                                                                                                                                                                                                                                                                                                                                                                                                                                                             |
| Manuscript ID                   | bmjopen-2020-037643.R1                                                                                                                                                                                                                                                                                                                                                                                                                                                                                                                                                                                                                                                                                                                                                                                                                                                                                                                                                                                                                                                      |
| Article Type:                   | Protocol                                                                                                                                                                                                                                                                                                                                                                                                                                                                                                                                                                                                                                                                                                                                                                                                                                                                                                                                                                                                                                                                    |
| Date Submitted by the Author:   | 30-Apr-2020                                                                                                                                                                                                                                                                                                                                                                                                                                                                                                                                                                                                                                                                                                                                                                                                                                                                                                                                                                                                                                                                 |
| Complete List of Authors:       | Soobiah, Charlene ; Women's College Hospital, Women's College Hospital Institute for Health System Solutions and Virtual Care<br>Cooper, Madeline; Women's College Hospital, Women's College Hospital Institute for Health System Solutions and Virtual Care<br>Kishimoto, Vanessa; Women's College Hospital, Institute for Health System Solutions and Virtual Care<br>Bhatia, R.; Women's College Hospital, Institute for Health System Solutions and Virtual Care<br>Scott, Ted; Hamilton Health Sciences; McMaster University<br>Maloney, Shelagh; Canada Health Infoway<br>Larsen, Darren; Women's College Hospital, Institute for Health System Solutions and Virtual Care; OntarioMD<br>Wijeyesundera, Harindra; Sunnybrook Health Sciences Centre, Zelmer, Jennifer; Canadian Foundation for Healthcare Improvement<br>SteeleGray, Carolyn; Sinai Health System, Bridgepoint Collaboratory for Research and Innovation, Lunenfeld-Tanenbaum Research Institute<br>Desveaux, Laura; Women's College Hospital, Institute for Health System Solutions and Virtual Care |
| <b>Primary Subject Heading</b>: | Health services research                                                                                                                                                                                                                                                                                                                                                                                                                                                                                                                                                                                                                                                                                                                                                                                                                                                                                                                                                                                                                                                    |
| Secondary Subject Heading:      | Research methods, Evidence based practice                                                                                                                                                                                                                                                                                                                                                                                                                                                                                                                                                                                                                                                                                                                                                                                                                                                                                                                                                                                                                                   |
| Keywords:                       | Protocols & guidelines < HEALTH SERVICES ADMINISTRATION & MANAGEMENT, Quality in health care < HEALTH SERVICES ADMINISTRATION & MANAGEMENT, STATISTICS & RESEARCH METHODS                                                                                                                                                                                                                                                                                                                                                                                                                                                                                                                                                                                                                                                                                                                                                                                                                                                                                                   |
|                                 |                                                                                                                                                                                                                                                                                                                                                                                                                                                                                                                                                                                                                                                                                                                                                                                                                                                                                                                                                                                                                                                                             |

SCHOLARONE™  
Manuscripts



I, the Submitting Author has the right to grant and does grant on behalf of all authors of the Work (as defined in the below author licence), an exclusive licence and/or a non-exclusive licence for contributions from authors who are: i) UK Crown employees; ii) where BMJ has agreed a CC-BY licence shall apply, and/or iii) in accordance with the terms applicable for US Federal Government officers or employees acting as part of their official duties; on a worldwide, perpetual, irrevocable, royalty-free basis to BMJ Publishing Group Ltd ("BMJ") its licensees and where the relevant Journal is co-owned by BMJ to the co-owners of the Journal, to publish the Work in this journal and any other BMJ products and to exploit all rights, as set out in our [licence](#).

The Submitting Author accepts and understands that any supply made under these terms is made by BMJ to the Submitting Author unless you are acting as an employee on behalf of your employer or a postgraduate student of an affiliated institution which is paying any applicable article publishing charge ("APC") for Open Access articles. Where the Submitting Author wishes to make the Work available on an Open Access basis (and intends to pay the relevant APC), the terms of reuse of such Open Access shall be governed by a Creative Commons licence – details of these licences and which [Creative Commons](#) licence will apply to this Work are set out in our licence referred to above.

Other than as permitted in any relevant BMJ Author's Self Archiving Policies, I confirm this Work has not been accepted for publication elsewhere, is not being considered for publication elsewhere and does not duplicate material already published. I confirm all authors consent to publication of this Work and authorise the granting of this licence.

1  
2  
3 **Identifying optimal frameworks to implement or evaluate digital health interventions: A**  
4 **scoping review protocol**  
5  
6  
7  
8

9  
10 Charlene Soobiah<sup>1,2</sup>, Madeline Cooper<sup>1</sup>, Vanessa Kishimoto<sup>1</sup>, R. Sacha Bhatia<sup>1</sup>, Ted Scott<sup>3,4</sup>,  
11 Shelagh Maloney<sup>5</sup>, Darren Larsen<sup>1,6</sup>, Harindra C. Wijeyesundera<sup>7</sup>, Jennifer Zelmer<sup>8</sup>, Carolyn  
12 Steele Gray<sup>2,9</sup>, Laura Desveaux<sup>1,2\*</sup>  
13  
14  
15

16  
17  
18 Affiliations:  
19

20 1 Women's College Hospital Institute for Health System Solutions and Virtual Care, 76  
21 Grenville Street, Toronto ON M5S 1B2  
22

23  
24 2 University of Toronto Institute of Health Policy Management & Evaluation, 155 College,  
25 Toronto, ON M5T 3M6  
26

27  
28 3 Hamilton Health Sciences, King West, 293 Wellington, Suite 120, Hamilton ON, L8L 8E7  
29

30  
31 4 McMaster University School of Nursing, 1280 Main St West, Hamilton ON, L8L 8E7  
32

33  
34 5 Canada Health Infoway, 150 King Street West, Suite 1300 Toronto, ON M5H 1J9  
35

36  
37 6 Ontario MD, 150 Bloor St. West, Suite 900, Toronto, ON M5S 3C1  
38

39  
40 7 Schulich Heart Center, Sunnybrook Health Sciences Centre, 2075 Bayview Avenue, Toronto,  
41 ON M4N 3M5  
42

43  
44 8 Canadian Foundation for Healthcare Improvement, 150 Kent Street, Suite 200, Ottawa ON,  
45 K1P 0E4  
46

47  
48 9 Bridgepoint Collaboratory for Research and Innovation, Lunenfeld-Tanenbaum Research  
49 Institute, Sinai Health System 1 Bridgepoint Dr. Toronto, ON M4M 2B5  
50

51 **\*Corresponding author:** Dr. Laura Desveaux, [laura.desveaux@wchospital.ca](mailto:laura.desveaux@wchospital.ca), 416-323-6400  
52 x4302 , 76 Grenville Street Toronto, Ont. M5S 1B2  
53  
54  
55  
56  
57

1  
2  
3  
4  
5  
6  
7  
8  
9  
10  
11  
12  
13  
14  
15  
16  
17  
18  
19  
20  
21  
22  
23  
24  
25  
26  
27  
28  
29  
30  
31  
32  
33  
34  
35  
36  
37  
38  
39  
40  
41  
42  
43  
44  
45  
46  
47  
48  
49  
50  
51  
52  
53  
54  
55  
56  
57  
58  
59  
60

**Keywords:** scoping review, digital health interventions, evaluation frameworks, implementation frameworks,

**Word count:** 2308 (main text), 318 (abstract)

For peer review only



## Abstract

**Introduction:** Digital health interventions (DHIs) are defined as health services delivered electronically through formal or informal care. DHIs can range from electronic medical records used by providers to mobile health apps used by consumers to maintain wellness. DHIs involve complex interactions between user, technology and the healthcare team, posing challenges for implementation and evaluation. Theoretical or interpretive frameworks are crucial in providing researchers guidance and clarity on implementation or evaluation approaches; however, there is a lack of standardization on which frameworks to use in which contexts. Our goal is to conduct a scoping review to identify frameworks to guide the implementation or evaluation of DHIs.

**Methods and Analysis:** We will conduct a scoping review using methods outlined by the Joanna Briggs Institute Reviewers' Manual and will conform to the PRISMA Extension for Scoping Reviews. Studies will be included if they report on frameworks (i.e., theoretical, interpretive, developmental) that are used to guide either implementation or evaluation of DHIs. Electronic databases, including MEDLINE, EMBASE, CINAHL, and PsychINFO will be searched in addition to grey literature and reference lists of included studies. Citations and full text articles will be screened independently and in duplicate in Covidence after a reliability check among reviewers. We will use qualitative description to summarize findings and focus on how research objectives and type of DHIs are aligned with the frameworks used.

**Ethics and dissemination:** We have engaged an advisory panel of digital health knowledge users (i.e., policymakers, researchers and developers of DHIs) to provide input at strategic stages of the scoping review to enhance the relevance of findings and their uptake, including tailored dissemination activities. Specifically, they will provide feedback on the eligibility criteria, data abstraction elements, interpretation of findings and assist in developing key messages for dissemination. This study does not require ethical review. Findings from this review will support decision making when selecting appropriate frameworks to guide the implementation or evaluation of DHIs.

### Strengths and Limitations

- This will be one of the first scoping reviews to identify frameworks to implement or evaluate digital health interventions on a broad scale.
- The study protocol was informed by the Joanna Briggs Institute approach for scoping reviews and adheres to the PRISMA Extension for Scoping Reviews (PRISMA-ScR)
- Digital health knowledge users, such as policymakers, researchers, clinicians, and developers have been engaged in the design and development of the review since its inception to ensure relevance and scope of project.
- This scoping review will not examine the quality of the included studies or the usability of the frameworks, as such our findings will be limited to descriptive syntheses.
- Findings stemming from this review will provide practical guidance for digital health knowledge users and enable them to use evidence informed approaches to select optimal frameworks to implement or evaluate digital health interventions.

## 1 Introduction

2 Frameworks help to systematically organize and link research objectives or constructs, and  
3 provide useful insights in quantitative and qualitative analyses, which can inform interpretation or  
4 decision-making.<sup>1,2</sup> The Medical Research Council (MRC) categorizes frameworks into four  
5 distinct groups: 1) development frameworks, which can model processes and outcomes; 2)  
6 feasibility frameworks, which can guide pilot testing of an intervention; 3) implementation  
7 frameworks to guide evidence into clinical practice; and 4) evaluation frameworks, to determine  
8 intervention effectiveness.<sup>3</sup>

9 A recent scoping review, identified over 159 knowledge translation frameworks to guide  
10 implementation and evaluation of health interventions in clinical practice settings, presenting a  
11 plethora of options for the implementation and evaluation of digital health interventions (DHIs).<sup>4</sup>  
12 Implementation and evaluation frameworks present an opportunity to address gaps relating not  
13 only to whether an intervention works but provide actionable insights for how to support their  
14 uptake in practice.

15 DHIs differ from traditional health interventions such as implementing a new program or  
16 evaluating drug effectiveness. DHIs include any health service or treatment delivered using  
17 technology that aims to facilitate, capture, or exchange knowledge.<sup>5</sup> Examples of DHIs include  
18 electronic medical records, mobile applications or wearable sensors for remote monitoring. DHIs  
19 are complex, differ both in intended functionality (e.g., self-management support versus data  
20 sharing), and intended users (e.g., patients versus providers). DHIs are not static; instead the  
21 interaction between the technology, end-user and the healthcare team and setting is by its nature  
22 dynamic and thus can vary substantially over time.<sup>6</sup> Given the unique sociotechnical aspects of  
23 DHIs, it remains unclear which frameworks can be appropriately applied in this emerging field.

24 This paper outlines the protocol for a scoping review to identify frameworks to guide the  
25 implementation or evaluation of DHIs. Specifically, our objectives are to:

- 26 1. Identify frameworks designed to guide the implementation or evaluation of DHIs.
- 27 2. Identify the proposed role of each framework, including the constructs they target.
- 28 3. Describe how each framework has been applied in primary studies, if applicable.

29 The results of this review will provide practical guidance and support for researchers, clinicians,  
30 policymakers, and developers in selecting the most appropriate framework for DHIs, which will  
31 support evidence-based approaches in relation to implementation and evaluation efforts.

## 32 **Methods and Analysis**

33 We will conduct a scoping review to comprehensively search the literature, ‘map’ the  
34 evidence, and identify gaps in the research knowledge base.<sup>7 8</sup> The study will be conducted using  
35 established methods outlined by the Joanna Briggs Institute Reviewers’ Manual<sup>7</sup> and reporting  
36 will conform to the PRISMA Extension for Scoping Reviews (PRISMA-ScR).<sup>9</sup> Our protocol is  
37 registered on Open Science Framework (OSF) and is available at (<https://osf.io/8jydm/>). OSF is  
38 an open source platform where researchers can share protocols, data and contributes to  
39 transparency of research.<sup>10</sup>

## 40 **Eligibility Criteria**

41 Studies reporting on the development or application of frameworks (i.e., theoretical or  
42 interpretive) to guide implementation or evaluation of DHIs in healthcare will be included. We  
43 will use the WHO definition of healthcare which encompasses physical, mental and social well-  
44 being and spans across multiple disciplines such as psychology, sociology or medical sciences.<sup>11</sup>  
45 DHI was defined as any health service or treatment delivered using technology that aims to  
46 facilitate, capture, or exchange knowledge (formally or informally).<sup>5</sup> DHI definition was generated  
47 from a search of the literature and consultations with digital health knowledge users, including  
48 policymakers, researchers, clinicians and developers. Implementation frameworks will be  
49 operationalized according to MRC guidance, as frameworks that aim to guide research into  
50 practice, which can include development, feasibility, and dissemination frameworks.<sup>3</sup> Evaluation  
51 frameworks will be defined as frameworks that focus on determining the effectiveness of DHIs,  
52 which includes measuring outcomes and understanding processes or mechanisms of action.<sup>3</sup> No  
53 limitations will be placed on user population, comparators, study design, publication status or  
54 geographic region. Conference abstracts/proceedings and white papers will be included. We will  
55 include studies reported in other languages and use appropriate tools (i.e., Google translate,  
56 translation services, contact author) to assess inclusion. Commentaries and studies examining  
57 mathematical or statistical frameworks will be excluded.

## 58 **Information sources**

59 An experienced information specialist developed the literature search in consultation with  
60 the multidisciplinary research team. The search will be peer reviewed by a second information  
61 specialist using the Peer Review of Electronic Search Strategy (PRESS) checklist to ensure the  
62 search is comprehensive and maximizes appropriate search terms.<sup>12</sup>

63 We will search MEDLINE, EMBASE, CINAHL, and PsychINFO using key words such  
64 as ‘digital health’ and ‘framework’. Additional search terms were drawn from multiple disciplines  
65 such as psychology, nursing, sociology, and medicine to ensure comprehensiveness. The databases  
66 will be searched from inception to present and the search strategy is presented in Appendix 1. We  
67 chose not to use the BeHEMOTH (behaviour of interest, health context, exclusions, and models or  
68 theory) approach<sup>13</sup> as specified in our OSF registration. Although this approach has been  
69 successful in identifying frameworks in knowledge translation,<sup>4</sup> it did not prove to be a feasible  
70 approach in our scoping review as it yielded a vast number of citations with limited specificity  
71 related to our objectives. We utilized a simplified heuristic, which included identifying DHIs in  
72 various healthcare contexts, adding terms for frameworks, and removing exclusions such as animal  
73 studies (Appendix 1).

74 The search strategy will be supplemented by a search for grey literature using the checklist  
75 suggested by the Canadian Agency for Drugs and Technologies in Health (CADTH).<sup>14</sup>  
76 Specifically, we will search for white papers or benefit evaluation studies through Health  
77 Technology Assessment Agencies such as Agency for Healthcare Research and Quality (AHRQ)  
78 and National Institute for Health and Care Excellence (NICE), Canada Infoway and other relevant  
79 organizations involved in providing guidance on delivery of healthcare services. We will use  
80 keywords such as ‘digital health’, ‘frameworks’, and ‘benefits evaluation’ to refine our  
81 supplementary search. In addition, we will also scan reference lists of included studies and conduct  
82 a forward citation search (i.e., examine studies that reference the included studies) in Web of  
83 Science using the cited reference search feature. This will ensure our approach is comprehensive.

## 84 **Eligibility Screening Process**

85 Citations obtained from the literature search will be uploaded to Covidence,<sup>15</sup> a systematic  
86 review software program which organizes citations, enables screening of citations by multiple

1  
2  
3 87 reviewers, and identifies discrepancies. We will apply a two-step process for identifying relevant  
4  
5 88 citations. At level 1, titles and abstracts will be assessed using the eligibility criteria (Appendix 2).  
6  
7 89 Studies with abstracts fulfilling criteria will be passed to level 2 where the eligibility criteria will  
8  
9 90 be applied to the full text articles.

10  
11 91 Prior to screening, a pilot test will be completed using a random sample of 10% of citations  
12  
13 92 or full text articles, with the expressed purpose of assessing agreement between reviewers at each  
14  
15 93 level. Specifically, percent agreement will be used to assess agreement among reviewers (inter-  
16  
17 94 rater reliability  $\geq 80\%$  will be considered adequate). If agreement is not reached, a second pilot will  
18  
19 95 be conducted with another random sample of 10%. A third reviewer will mediate any  
20  
21 96 disagreements. Citations and full text articles will be screened in duplicate by two reviewers.

### 22 97 **Data items and abstraction process**

23  
24 98 Studies fulfilling the eligibility criteria will be abstracted in Excel. We will extract the  
25  
26 99 following study characteristics for the identified frameworks: name, reference, theory associated  
27  
28 100 with framework (if applicable), description of its components or constructs, and its application in  
29  
30 101 research (or stage of research to which it was applied, if applicable). For studies outlining the  
31  
32 102 application of a framework, additional characteristics will be abstracted such as the type of DHI,  
33  
34 103 healthcare setting, method of application, and nature and directionality of the results. We will  
35  
36 104 abstract information such as name of the framework, the role of framework in study (i.e.,  
37  
38 105 development, feasibility/pilot testing, implementation, evaluation), components of the framework  
39  
40 106 that were utilized, type of DHI, the objective of the study (if applicable), and healthcare setting  
41  
42 107 from included studies.

### 43 108 **Methodological appraisal**

44  
45 109 We will not assess the quality of included articles in the scoping review (consistent with  
46  
47 110 Joanna Briggs Institute Reviewer's Manual<sup>7</sup>) as our purpose is to gain an overview of frameworks  
48  
49 111 used in relation to DHIs and not to assess the quality of their application.

### 50 112 **Ethics and Dissemination**

51  
52  
53 113 This scoping review is focused on published reports and studies of DHI and does not  
54  
55 114 involve patients or primary data collection; as such, no formal ethics approval is required.

1  
2  
3 115 The dissemination plan will be tailored to end-users and will include passive and interactive  
4  
5 116 strategies such as peer reviewed publications, conference events and other network events with  
6  
7 117 digital health knowledge users. To ensure broader reach, we will also disseminate our findings  
8  
9 118 through social media platforms, and public-facing communications such as one-page briefs  
10  
11 119 released on the Women's College Institute for Health Innovation website at Women's College  
12  
13 120 hospital.

## 14 121 **Patient and Public Involvement**

15  
16 122 We employed an integrated knowledge translation strategy to engage digital health  
17  
18 123 knowledge users in the review process to ensure the scope of the project met the needs of various  
19  
20 124 end-users. Knowledge users are defined as individuals who are likely to use the findings to inform  
21  
22 125 health decision making.<sup>2</sup> A priori, we decided to engage senior leaders and policymakers at  
23  
24 126 organizations that promote or support implementation of digital health solutions, as well as  
25  
26 127 researchers, clinicians, and developers evaluating DHIs in real world settings. An advisory panel  
27  
28 128 of digital health knowledge users was established to provide input at strategic phases of the scoping  
29  
30 129 review.

31 130 Potential panelists were identified through organizational networks and were invited to participate  
32  
33 131 via email. Six members agreed to participate (CSG, TS, HCW, JZ, SM, DL) on the advisory panel.  
34  
35 132 Panelists and the research team convened a meeting and discussed the strategic steps and  
36  
37 133 opportunities for involvement and input in the review. Specifically, the advisory panel will support  
38  
39 134 refinement of inclusion criteria, prioritization of data abstraction elements, assist in interpretation  
40  
41 135 of findings and develop dissemination strategies. Panelists have national and international  
42  
43 136 networks that will ensure the scope of the review reflects the knowledge needs of a diverse  
44  
45 138 selection and application of frameworks for DHIs. As the intended audience of this paper does not  
46  
47 139 include patients and members of the general public, they were not included as part of the advisory  
48  
49 140 panel. The perspectives of patients and the general public will be incorporated through their  
50  
51 141 participation and involvement in the respective studies included as part of this review.

## 52 142 **Analysis**

1  
2  
3 143 Included studies will be summarized using qualitative description, an approach that seeks  
4  
5 144 to create an understanding of phenomenon through accessing the meanings ascribed by authors.<sup>16</sup>  
6  
7 145 Descriptions of individual frameworks will be organized by key categories, including study design,  
8  
9 146 report type (published vs non-published), methodological approach (i.e. how the framework is  
10  
11 147 intended to be applied) and application papers (i.e. how the framework has been applied in  
12  
13 148 practice). We will then synthesize findings by mapping core components of the frameworks and  
14  
15 149 examining how research objectives and type of DHIs are linked to the framework. Categorization  
16  
17 150 will use language directly from included studies, where possible, and authors will be contacted  
18  
19 151 when information is not present or unclear. The advisory panel will guide the synthesis of findings  
20  
21 152 by providing input on the level of detail abstracted from included articles and provide input on  
22  
23 153 categorization of frameworks, where appropriate.

### 24 25 154 **Strengths and Limitations**

26  
27 155 To our knowledge, this is the first scoping review to examine the use of frameworks to  
28  
29 156 guide implementation or evaluation of DHIs on a broad scale. A clear understanding of which  
30  
31 157 frameworks can be used for development, feasibility, implementation and evaluation of DHIs will  
32  
33 158 facilitate decision making by making evidence-based approaches available to policymakers,  
34  
35 159 researchers, clinicians and developers.

36  
37 160 Given the breadth of this scoping review, we anticipate a few key challenges. The first  
38  
39 161 relates to the inconsistent and often ill-defined nature of DHIs and frameworks. To be inclusive,  
40  
41 162 we have defined DHIs broadly as any health intervention that can be delivered through technology  
42  
43 163 to ensure we capture frameworks that are currently being used across healthcare settings.  
44  
45 164 Moreover, the term framework also creates challenges, as we have defined as a tool to  
46  
47 165 systematically organize and link research questions or constructs, but a range of terms are often  
48  
49 166 used synonymously (e.g., models or processes). To account for this, we will include studies  
50  
51 167 reporting on 'models' and work closely with the advisory panel to confirm whether the reported  
52  
53 168 framework aligns with our *a priori* definition. Relatedly, authors may not provide sufficient details  
54  
55 169 on the frameworks they utilize or their method of application. To mitigate this, we will contact  
56  
57 170 authors to obtain additional information whenever information is missing or unclear. Finally, we  
58  
59 171 anticipate that some included frameworks will have a dual purpose of addressing implementation  
60  
172 and evaluation or may contain components that lend themselves to both constructs. When this



1  
2  
3 173 occurs, we will discuss the overlap with digital health knowledge users and devise the most  
4  
5 174 appropriate plan for analysis.  
6

7 175 We also anticipate challenges searching the literature. DHIs are not well defined in  
8  
9 176 electronic databases as they are referenced using a plethora of key terms. As such, we have  
10  
11 177 constructed our search to balance comprehensiveness and specificity. We have worked closely  
12  
13 178 with an information specialist to ensure the number of citations are focused and feasible. Several  
14  
15 179 iterations of the literature search were conducted using a randomized sample of 200 citations and  
16  
17 180 the specificity and sensitivity of search terms were tested using the inclusion criteria. Two  
18  
19 181 reviewers screened citations, discrepancies were discussed among the internal research team, and  
20  
21 182 the number of included studies were examined to explore the specificity of search terms. Through  
22  
23 183 iterative testing, we feel confident in our current literature strategy, however, additional challenges  
24  
25 184 may arise when screening.

26 185 Overall, identification of frameworks will serve as a guide for researchers, clinicians,  
27  
28 186 policymakers, and developers of DHIs by providing practical guidance on which frameworks may  
29  
30 187 be most appropriate for which objectives (i.e., implementation or evaluation). In parallel, the  
31  
32 188 results will contribute to a more nuanced understanding of how to evaluate and implement DHIs,  
33  
34 189 including the identification and understanding of key constructs.  
35

36 190

37 191  
38  
39  
40  
41  
42  
43  
44  
45  
46  
47  
48  
49  
50  
51  
52  
53  
54  
55  
56  
57

192 **References:**

- 193 1. Tabak RG, Khoong EC, Chambers DA, et al. Bridging research and practice: models for dissemination  
194 and implementation research. *Am J Prev Med* 2012;43(3):337-50. doi:  
195 10.1016/j.amepre.2012.05.024 [published Online First: 2012/08/18]
- 196 2. Straus S, Tetroe, J., Graham, ID.,. Knowledge Translation in Health Care: Moving from Evidence to  
197 Practice 2014.
- 198 3. Craig P, Dieppe P, Macintyre S, et al. Developing and evaluating complex interventions: the new  
199 Medical Research Council guidance. *International journal of nursing studies* 2013;50(5):587-92.  
200 doi: 10.1016/j.ijnurstu.2012.09.010
- 201 4. Strifler L, Cardoso R, McGowan J, et al. Scoping review identifies significant number of knowledge  
202 translation theories, models, and frameworks with limited use. *J Clin Epidemiol* 2018;100:92-  
203 102. doi: 10.1016/j.jclinepi.2018.04.008 [published Online First: 2018/04/17]
- 204 5. Murray E, Hekler EB, Andersson G, et al. Evaluating Digital Health Interventions: Key Questions and  
205 Approaches. *Am J Prev Med* 2016;51(5):843-51. doi: 10.1016/j.amepre.2016.06.008 [published  
206 Online First: 2016/10/18]
- 207 6. Shaw J. AP, Desveaux L., Conejo Palma D., Stamenova V., Jamieson T., Yang R., Bhatia RS.,  
208 Bhattacharyya O., . Beyond "implementation": digital health innovation and service design. *NPJ*  
209 *Digital Medicine* 2018;1:48.
- 210 7. Aromataris E. MZ, editor. *Joanna Briggs Institute Reviewer's Manual*. The Joanna Briggs Institute,  
211 2017.
- 212 8. Arksey H, O'Malley, L. Scoping studies: towards a methodological framework. *International Journal of*  
213 *Social Research Methodology* 2005;8(1):19-32.
- 214 9. Tricco AC, Lillie E, Zarin W, et al. PRISMA Extension for Scoping Reviews (PRISMA-ScR): Checklist and  
215 Explanation. *Ann Intern Med* 2018;169(7):467-73. doi: 10.7326/M18-0850 [published Online  
216 First: 2018/09/05]
- 217 10. Foster E, Deardorff. Open Science Framework (OSF). *J Med Libr Assoc* 2017;105(2):203–06.
- 218 11. Organization WH. Constitution 20 [Available from: [https://www.who.int/about/who-we-](https://www.who.int/about/who-we-are/constitution)  
219 [are/constitution](https://www.who.int/about/who-we-are/constitution) accessed April 13 2020.
- 220 12. McGowan J, Sampson M, Salzwedel DM, et al. PRESS Peer Review of Electronic Search Strategies:  
221 2015 Guideline Statement. *J Clin Epidemiol* 2016;75:40-6. doi: 10.1016/j.jclinepi.2016.01.021  
222 [published Online First: 2016/03/24]
- 223 13. Booth A, Carroll C. Systematic searching for theory to inform systematic reviews: is it feasible? Is it  
224 desirable? *Health Info Libr J* 2015;32(3):220-35. doi: 10.1111/hir.12108 [published Online First:  
225 2015/06/23]
- 226 14. Canadian Agency for Drugs and Technologies in Health (CADTH). Grey Matters: A practical search  
227 tool for evidence-based medicine. 2013 [Available from: [http://www.cadth.ca/resources/grey-](http://www.cadth.ca/resources/grey-matters)  
228 [matters](http://www.cadth.ca/resources/grey-matters).
- 229 15. Covidence. 2019 [Available from: <https://www.covidence.org/home>.
- 230 16. Sandelowski M. What's in a name? Qualitative description revisited. *Research in Nursing Health*  
231 2010;33(1):77-84.

1  
2  
3 **233 Authors' Contributions:**  
4

5 234 CS, LD conceived and developed the study. CS drafted the manuscript. MC, VK, RSB, TS, SM,  
6  
7 235 DL, HCW, JZ, CGS, and LD reviewed and edited the manuscript.  
8

9  
10 **236 Funding:**

11  
12 237 This research received no specific grant from any funding agency in the public, commercial or  
13 238 not-for-profit sectors.  
14

15 **239 Conflict of Interest:**

16  
17 240 The authors have no conflicts of interest to report.  
18  
19

20 **241 Acknowledgement:**

21  
22 242 We would like to thank Becky Skidmore, and Anne Dabrowski for their assistance with  
23  
24 243 generating the literature search, as well as Beatrice Choremis, who helped screen a few  
25  
26 244 preliminary citations.  
27  
28  
29  
30  
31  
32  
33  
34  
35  
36  
37  
38  
39  
40  
41  
42  
43  
44  
45  
46  
47  
48  
49  
50  
51  
52  
53  
54  
55  
56  
57  
58  
59  
60

1  
2  
3  
4  
5  
6  
7  
8  
9  
10  
11  
12  
13  
14  
15  
16  
17  
18  
19  
20  
21  
22  
23  
24  
25  
26  
27  
28  
29  
30  
31  
32  
33  
34  
35  
36  
37  
38  
39  
40  
41  
42  
43  
44  
45  
46  
47  
48  
49  
50  
51  
52  
53  
54  
55  
56  
57  
58  
59  
60

245

For peer review only

## 1 Appendix 1. Primary Literature Search in Medline

2 Database: Ovid MEDLINE: Epub Ahead of Print, In-Process & Other Non-Indexed Citations, Ovid  
3 MEDLINE® Daily and Ovid MEDLINE® <1946-Present>

4 Search Strategy:

5 -----

6 1 exp Telemedicine/ (25845)

7 2 (telemed\* or tele-med\* or telecare or tele-care or teleconsult\* or tele-consult\* or telehealth\* or  
8 tele-health\* or telemonitor\* or tele-monitor\* or telerehab\* or tele-rehab\*).tw,kf. (17416)

9 3 (ehealth\* or e-health\* or mhealth\* or m-health\* or emental health\* or e-mental health\* or  
10 epsychiatr\* or e-psychiatr\* or epsychol\* or e-psychol\* or etherap\* or e-therap\*).tw,kf. (10073)

11 4 (emedicine or e-medicine\*).tw,kf. (78)

12 5 (mobile health\* or mobile care or mobile medicine).tw,kf. (3793)

13 6 (digital\* adj3 (medic\* or care or health\* or healthcare or health-care)).tw,kf. (3065)

14 7 (digital\* adj3 (consult\* or diagnos\* or intervention? or manag\* or monitor\* or palliat\* or rehab\* or  
15 surger\* or surgic\* or therap\* or treatment?)).tw,kf. (5936)

16 8 (remote\* adj3 (consult\* or diagnos\* or intervention? or manag\* or monitor\* or palliat\* or rehab\* or  
17 surger\* or surgic\* or therap\* or treatment?)).tw,kf. (6643)

18 9 Monitoring, Ambulatory/ (7806)

19 10 ((outpatient\* or out-patient\* or ambulator\* or home? or homebased or home-based) adj3  
20 (manag\* or monitor\*)).tw,kf. (24341)

21 11 exp Biomedical Technology/ (13203)

22 12 ((biomedic\* or bio-medic\* or health\* or healthcare or health care or medical) adj  
23 technolog\*).tw,kf. (13535)

24 13 Medical Informatics/ or Medical Informatics Applications/ (13622)

25 14 ((health\* or medical) adj informatic\*).tw,kf. (5056)

26 15 exp Therapy, Computer-Assisted/ (59720)

27 16 ((internet\* or app or apps or computer\* or cyber\* or digital\* or e-application? or e-mail\* or email\*  
28 or electronic mail\* or iphone? or i-phone? or (mobile adj2 application?) or mobile-based or mobile  
29 phone? or online or smarthome\* or smart-home\* or smartphone\* or smart phone\* or technolog\* or  
30 webbased or web-based or webdeliver\* or web-deliver\* or "web 2.0") adj3 care).tw,kf. (8049)

31 17 ((internet\* or app or apps or computer\* or cyber\* or digital\* or e-application? or e-mail\* or email\*  
32 or electronic mail\* or iphone? or i-phone? or (mobile adj2 application?) or mobile-based or mobile  
33 phone? or online or smarthome\* or smart-home\* or smartphone\* or smart phone\* or technolog\* or  
34 webbased or web-based or webdeliver\* or web-deliver\* or "web 2.0") adj3 health\*).tw,kf. (27319)

35 18 ((internet\* or app or apps or computer\* or cyber\* or digital\* or e-application? or e-mail\* or email\*  
36 or electronic mail\* or iphone? or i-phone? or (mobile adj2 application?) or mobile-based or mobile  
37 phone? or online or smarthome\* or smart-home\* or smartphone\* or smart phone\* or technolog\* or  
38 webbased or web-based or webdeliver\* or web-deliver\* or "web 2.0") adj3 (healthcare or health  
39 care)).tw,kf. (6410)

40 19 ((internet\* or app or apps or computer\* or cyber\* or digital\* or e-application? or e-mail\* or email\*  
41 or electronic mail\* or iphone? or i-phone? or (mobile adj2 application?) or mobile-based or mobile  
42 phone? or online or smarthome\* or smart-home\* or smartphone\* or smart phone\* or technolog\* or  
43 webbased or web-based or webdeliver\* or web-deliver\* or "web 2.0") adj3 (medicine or medical)).tw,kf.  
44 (19800)

45 20 ((internet\* or app or apps or computer\* or cyber\* or digital\* or e-application? or e-mail\* or email\*  
46 or electronic mail\* or iphone? or i-phone? or (mobile adj2 application?) or mobile-based or mobile

1  
2  
3 47 phone? or online or smarthome\* or smart-home\* or smartphone\* or smart phone\* or technolog\* or  
4 48 webbased or web-based or webdeliver\* or web-deliver\* or "web 2.0" adj3 consult\*).tw,kf. (1299)  
5 49 21 ((internet\* or app or apps or computer\* or cyber\* or digital\* or e-application? or e-mail\* or email\*  
6 50 or electronic mail\* or iphone? or i-phone? or (mobile adj2 application?) or mobile-based or mobile  
7 51 phone? or online or smarthome\* or smart-home\* or smartphone\* or smart phone\* or technolog\* or  
8 52 webbased or web-based or webdeliver\* or web-deliver\* or "web 2.0" adj3 diagnos\*).tw,kf. (13043)  
9 53 22 ((internet\* or app or apps or computer\* or cyber\* or digital\* or e-application? or e-mail\* or email\*  
10 54 or electronic mail\* or iphone? or i-phone? or (mobile adj2 application?) or mobile-based or mobile  
11 55 phone? or online or smarthome\* or smart-home\* or smartphone\* or smart phone\* or technolog\* or  
12 56 webbased or web-based or webdeliver\* or web-deliver\* or "web 2.0" adj3 intervention?).tw,kf. (9139)  
13 57 23 ((internet\* or app or apps or computer\* or cyber\* or digital\* or e-application? or e-mail\* or email\*  
14 58 or electronic mail\* or iphone? or i-phone? or (mobile adj2 application?) or mobile-based or mobile  
15 59 phone? or online or smarthome\* or smart-home\* or smartphone\* or smart phone\* or technolog\* or  
16 60 webbased or web-based or webdeliver\* or web-deliver\* or "web 2.0" adj3 manag\*).tw,kf. (7259)  
17 61 24 ((internet\* or app or apps or computer\* or cyber\* or digital\* or e-application? or e-mail\* or email\*  
18 62 or electronic mail\* or iphone? or i-phone? or (mobile adj2 application?) or mobile-based or mobile  
19 63 phone? or online or smarthome\* or smart-home\* or smartphone\* or smart phone\* or technolog\* or  
20 64 webbased or web-based or webdeliver\* or web-deliver\* or "web 2.0" adj3 monitor\*).tw,kf. (8457)  
21 65 25 ((internet\* or app or apps or computer\* or cyber\* or digital\* or e-application? or e-mail\* or email\*  
22 66 or electronic mail\* or iphone? or i-phone? or (mobile adj2 application?) or mobile-based or mobile  
23 67 phone? or online or smarthome\* or smart-home\* or smartphone\* or smart phone\* or technolog\* or  
24 68 webbased or web-based or webdeliver\* or web-deliver\* or "web 2.0" adj3 palliat\*).tw,kf. (133)  
25 69 26 ((internet\* or app or apps or computer\* or cyber\* or digital\* or e-application? or e-mail\* or email\*  
26 70 or electronic mail\* or iphone? or i-phone? or (mobile adj2 application?) or mobile-based or mobile  
27 71 phone? or online or smarthome\* or smart-home\* or smartphone\* or smart phone\* or technolog\* or  
28 72 webbased or web-based or webdeliver\* or web-deliver\* or "web 2.0" adj3 rehab\*).tw,kf. (1264)  
29 73 27 ((internet\* or app or apps or computer\* or cyber\* or digital\* or e-application? or e-mail\* or email\*  
30 74 or electronic mail\* or iphone? or i-phone? or (mobile adj2 application?) or mobile-based or mobile  
31 75 phone? or online or smarthome\* or smart-home\* or smartphone\* or smart phone\* or technolog\* or  
32 76 webbased or web-based or webdeliver\* or web-deliver\* or "web 2.0" adj3 (surger\* or surgic\*).tw,kf.  
33 77 (7354)  
34 78 28 ((internet\* or app or apps or computer\* or cyber\* or digital\* or e-application? or e-mail\* or email\*  
35 79 or electronic mail\* or iphone? or i-phone? or (mobile adj2 application?) or mobile-based or mobile  
36 80 phone? or online or smarthome\* or smart-home\* or smartphone\* or smart phone\* or technolog\* or  
37 81 webbased or web-based or webdeliver\* or web-deliver\* or "web 2.0" adj3 therap\*).tw,kf. (6817)  
38 82 29 ((internet\* or app or apps or computer\* or cyber\* or digital\* or e-application? or e-mail\* or email\*  
39 83 or electronic mail\* or iphone? or i-phone? or (mobile adj2 application?) or mobile-based or mobile  
40 84 phone? or online or smarthome\* or smart-home\* or smartphone\* or smart phone\* or technolog\* or  
41 85 webbased or web-based or webdeliver\* or web-deliver\* or "web 2.0" adj3 treatment?).tw,kf. (10336)  
42 86 30 Wearable Electronic Devices/ (1321)  
43 87 31 wearable?.tw,kf. (10007)  
44 88 32 or/1-31 (253918)  
45 89 33 exp \*Delivery of Health Care/ (619520)  
46 90 34 exp Computers/ (76307)  
47 91 35 Electronic Mail/ (2573)  
48 92 36 Internet/ (69753)  
49 93 37 Telecommunications/ (4741)

1  
2  
3 94 38 (internet\* or app or apps or computer\* or cyber\* or digital\* or e-application? or e-mail\* or email\*  
4 95 or electronic mail\* or iphone? or i-phone? or (mobile adj2 application?) or mobile-based or mobile  
5 96 phone? or online or smarthome\* or smart-home\* or smartphone\* or smart phone\* or technolog\* or  
6 97 webbased or web-based or webdeliver\* or web-deliver\*).tw,kf. (995758)  
7  
8 98 39 33 and (34 or 35 or 36 or 37 or 38) (50511)  
9 99 40 32 or 39 [DIGITAL HEALTH APPLICATIONS] (282776)  
10 100 41 (evaluat\* adj3 (design\* or frame or frames or framework? or guid\* or model or models or schem\*  
11 101 or strateg\* or theor\*).tw,kf. (105535)  
12 102 42 (apprais\* adj3 (frame or frames or framework? or model or models or theor\*).tw,kf. (927)  
13 103 43 (apprais\* adj3 (design\* or guid\* or schem\* or strateg\*).ti,kf. (313)  
14 104 44 (assess\* adj3 (frame or frames or framework? or model or models or theor\*).tw,kf. (47798)  
15 105 45 (assess\* adj3 (design\* or guid\* or schem\* or strateg\*).ti,kf. (3366)  
16 106 46 (implement\* adj3 (design\* or frame or frames or framework? or guid\* or model or models or  
17 107 schem\* or strateg\* or theor\*).tw,kf. (57152)  
18 108 47 (evidence-based adj (frame or frames or framework? or model or models or theor\*).tw,kf. (769)  
19 109 48 (evidence-based adj (design\* or guid\* or schem\* or strateg\*).ti,kf. (1559)  
20 110 49 (service adj (frame or frames or framework? or model or models or theor\*).tw,kf. (2165)  
21 111 50 (service adj (design\* or guid\* or schem\* or strateg\*).ti,kf. (201)  
22 112 51 or/41-50 [EVALUATION/IMPLEMENTATION FRAMEWORKS] (212588)  
23 113 52 40 and 51 [DIGITAL HEALTH - EVALUATION/IMPLEMENTATION FRAMEWORKS] (8974)  
24 114 53 exp Animals/ not Humans/ (4614915)  
25 115 54 52 not 53 [ANIMAL-ONLY REMOVED] (8859)  
26  
27  
28 116  
29 117 \*\*\*\*\*  
30  
31  
32  
33  
34  
35  
36  
37  
38  
39  
40  
41  
42  
43  
44  
45  
46  
47  
48  
49  
50  
51  
52  
53  
54  
55  
56  
57  
58  
59  
60

## 1 Appendix 2. Eligibility Criteria

### Question 1: Does this study include humans?

- 2 a. If yes, **INCLUDE**
- 3 b. **EXCLUDE** animal studies/models, non-humans or vertebrae studies

### Question 2: Does this study examine the use of a digital health intervention?

- 4 a. **INCLUDE** studies focusing on digital health interventions as their primary component of  
5 the study. A digital health intervention is any health intervention that is being delivered  
6 by technology and can include the following items: ehealth, virtual healthcare,  
7 smartphone apps aimed at healthcare issue, wearable technologies, telemedicine or health  
8 education interventions delivered digitally.
- 9 b. **EXCLUDE** interventions that are focused on creating scales, checklists or other metrics  
10 that are not a digital health intervention.
  - 11 • Example of an exclude: a cross-sectional study to create a checklist for  
12 conducting health technology assessments.

### Question 3: Does this study use a framework to implement or evaluate the digital intervention?

- 13 a. **INCLUDE** studies that focus on frameworks. Frameworks can help guide evaluation  
14 questions by systematically organizing and linking research questions when evaluating a  
15 digital intervention.
- 16 b. **EXCLUDE** studies that discuss checklists, theoretical mathematical models or statistical  
17 models.

### Question 4: Is this an experimental study, qualitative study, or review?

- 19 a. **INCLUDE** any study design (i.e., randomized controlled trials, observational studies,  
20 cross-sectional studies, qualitative studies, systematic review)
- 21 b. **EXCLUDE** studies if it's an editorial (without any primary data), letter to the editor or  
22 commentary.



## Preferred Reporting Items for Systematic reviews and Meta-Analyses extension for Scoping Reviews (PRISMA-ScR) Checklist

| SECTION                                               | ITEM | PRISMA-ScR CHECKLIST ITEM                                                                                                                                                                                                                                                                                  | REPORTED ON PAGE # |
|-------------------------------------------------------|------|------------------------------------------------------------------------------------------------------------------------------------------------------------------------------------------------------------------------------------------------------------------------------------------------------------|--------------------|
| <b>TITLE</b>                                          |      |                                                                                                                                                                                                                                                                                                            |                    |
| Title                                                 | 1    | Identify the report as a scoping review.                                                                                                                                                                                                                                                                   |                    |
| <b>ABSTRACT</b>                                       |      |                                                                                                                                                                                                                                                                                                            |                    |
| Structured summary                                    | 2    | Provide a structured summary that includes (as applicable): background, objectives, eligibility criteria, sources of evidence, charting methods, results, and conclusions that relate to the review questions and objectives.                                                                              |                    |
| <b>INTRODUCTION</b>                                   |      |                                                                                                                                                                                                                                                                                                            |                    |
| Rationale                                             | 3    | Describe the rationale for the review in the context of what is already known. Explain why the review questions/objectives lend themselves to a scoping review approach.                                                                                                                                   |                    |
| Objectives                                            | 4    | Provide an explicit statement of the questions and objectives being addressed with reference to their key elements (e.g., population or participants, concepts, and context) or other relevant key elements used to conceptualize the review questions and/or objectives.                                  |                    |
| <b>METHODS</b>                                        |      |                                                                                                                                                                                                                                                                                                            |                    |
| Protocol and registration                             | 5    | Indicate whether a review protocol exists; state if and where it can be accessed (e.g., a Web address); and if available, provide registration information, including the registration number.                                                                                                             |                    |
| Eligibility criteria                                  | 6    | Specify characteristics of the sources of evidence used as eligibility criteria (e.g., years considered, language, and publication status), and provide a rationale.                                                                                                                                       |                    |
| Information sources*                                  | 7    | Describe all information sources in the search (e.g., databases with dates of coverage and contact with authors to identify additional sources), as well as the date the most recent search was executed.                                                                                                  |                    |
| Search                                                | 8    | Present the full electronic search strategy for at least 1 database, including any limits used, such that it could be repeated.                                                                                                                                                                            |                    |
| Selection of sources of evidence†                     | 9    | State the process for selecting sources of evidence (i.e., screening and eligibility) included in the scoping review.                                                                                                                                                                                      |                    |
| Data charting process‡                                | 10   | Describe the methods of charting data from the included sources of evidence (e.g., calibrated forms or forms that have been tested by the team before their use, and whether data charting was done independently or in duplicate) and any processes for obtaining and confirming data from investigators. |                    |
| Data items                                            | 11   | List and define all variables for which data were sought and any assumptions and simplifications made.                                                                                                                                                                                                     |                    |
| Critical appraisal of individual sources of evidence§ | 12   | If done, provide a rationale for conducting a critical appraisal of included sources of evidence; describe the methods used and how this information was used in any data synthesis (if appropriate).                                                                                                      |                    |
| Synthesis of results                                  | 13   | Describe the methods of handling and summarizing the data that were charted.                                                                                                                                                                                                                               |                    |

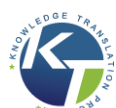

| SECTION                                       | ITEM | PRISMA-ScR CHECKLIST ITEM                                                                                                                                                                       | REPORTED ON PAGE # |
|-----------------------------------------------|------|-------------------------------------------------------------------------------------------------------------------------------------------------------------------------------------------------|--------------------|
| <b>RESULTS</b>                                |      |                                                                                                                                                                                                 |                    |
| Selection of sources of evidence              | 14   | Give numbers of sources of evidence screened, assessed for eligibility, and included in the review, with reasons for exclusions at each stage, ideally using a flow diagram.                    |                    |
| Characteristics of sources of evidence        | 15   | For each source of evidence, present characteristics for which data were charted and provide the citations.                                                                                     |                    |
| Critical appraisal within sources of evidence | 16   | If done, present data on critical appraisal of included sources of evidence (see item 12).                                                                                                      |                    |
| Results of individual sources of evidence     | 17   | For each included source of evidence, present the relevant data that were charted that relate to the review questions and objectives.                                                           |                    |
| Synthesis of results                          | 18   | Summarize and/or present the charting results as they relate to the review questions and objectives.                                                                                            |                    |
| <b>DISCUSSION</b>                             |      |                                                                                                                                                                                                 |                    |
| Summary of evidence                           | 19   | Summarize the main results (including an overview of concepts, themes, and types of evidence available), link to the review questions and objectives, and consider the relevance to key groups. |                    |
| Limitations                                   | 20   | Discuss the limitations of the scoping review process.                                                                                                                                          |                    |
| Conclusions                                   | 21   | Provide a general interpretation of the results with respect to the review questions and objectives, as well as potential implications and/or next steps.                                       |                    |
| <b>FUNDING</b>                                |      |                                                                                                                                                                                                 |                    |
| Funding                                       | 22   | Describe sources of funding for the included sources of evidence, as well as sources of funding for the scoping review. Describe the role of the funders of the scoping review.                 |                    |

JBI = Joanna Briggs Institute; PRISMA-ScR = Preferred Reporting Items for Systematic reviews and Meta-Analyses extension for Scoping Reviews.

\* Where *sources of evidence* (see second footnote) are compiled from, such as bibliographic databases, social media platforms, and Web sites.

† A more inclusive/heterogeneous term used to account for the different types of evidence or data sources (e.g., quantitative and/or qualitative research, expert opinion, and policy documents) that may be eligible in a scoping review as opposed to only studies. This is not to be confused with *information sources* (see first footnote).

‡ The frameworks by Arksey and O'Malley (6) and Levac and colleagues (7) and the JBI guidance (4, 5) refer to the process of data extraction in a scoping review as data charting.

§ The process of systematically examining research evidence to assess its validity, results, and relevance before using it to inform a decision. This term is used for items 12 and 19 instead of "risk of bias" (which is more applicable to systematic reviews of interventions) to include and acknowledge the various sources of evidence that may be used in a scoping review (e.g., quantitative and/or qualitative research, expert opinion, and policy document).

From: Tricco AC, Lillie E, Zarin W, O'Brien KK, Colquhoun H, Levac D, et al. PRISMA Extension for Scoping Reviews (PRISMA-ScR): Checklist and Explanation. *Ann Intern Med.* 2018;169:467–473. doi: 10.7326/M18-0850.

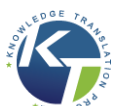

# BMJ Open

## Identifying optimal frameworks to implement or evaluate digital health interventions: A scoping review protocol

|                                 |                                                                                                                                                                                                                                                                                                                                                                                                                                                                                                                                                                                                                                                                                                                                                                                                                                                                                                                                                                                                                                                                           |
|---------------------------------|---------------------------------------------------------------------------------------------------------------------------------------------------------------------------------------------------------------------------------------------------------------------------------------------------------------------------------------------------------------------------------------------------------------------------------------------------------------------------------------------------------------------------------------------------------------------------------------------------------------------------------------------------------------------------------------------------------------------------------------------------------------------------------------------------------------------------------------------------------------------------------------------------------------------------------------------------------------------------------------------------------------------------------------------------------------------------|
| Journal:                        | <i>BMJ Open</i>                                                                                                                                                                                                                                                                                                                                                                                                                                                                                                                                                                                                                                                                                                                                                                                                                                                                                                                                                                                                                                                           |
| Manuscript ID                   | bmjopen-2020-037643.R2                                                                                                                                                                                                                                                                                                                                                                                                                                                                                                                                                                                                                                                                                                                                                                                                                                                                                                                                                                                                                                                    |
| Article Type:                   | Protocol                                                                                                                                                                                                                                                                                                                                                                                                                                                                                                                                                                                                                                                                                                                                                                                                                                                                                                                                                                                                                                                                  |
| Date Submitted by the Author:   | 15-Jun-2020                                                                                                                                                                                                                                                                                                                                                                                                                                                                                                                                                                                                                                                                                                                                                                                                                                                                                                                                                                                                                                                               |
| Complete List of Authors:       | Soobiah, Charlene ; Women's College Hospital, Women's College Hospital Institute for Health System Solutions and Virtual Care<br>Cooper, Madeline; Women's College Hospital, Women's College Hospital Institute for Health System Solutions and Virtual Care<br>Kishimoto, Vanessa; Women's College Hospital, Institute for Health System Solutions and Virtual Care<br>Bhatia, R.; Women's College Hospital, Institute for Health System Solutions and Virtual Care<br>Scott, Ted; Hamilton Health Sciences; McMaster University<br>Maloney, Shelagh; Canada Health Infoway<br>Larsen, Darren; Women's College Hospital, Institute for Health System Solutions and Virtual Care; OntarioMD<br>Wijesundera, Harindra; Sunnybrook Health Sciences Centre, Zelmer, Jennifer; Canadian Foundation for Healthcare Improvement<br>SteeleGray, Carolyn; Sinai Health System, Bridgepoint Collaboratory for Research and Innovation, Lunenfeld-Tanenbaum Research Institute<br>Desveaux, Laura; Women's College Hospital, Institute for Health System Solutions and Virtual Care |
| <b>Primary Subject Heading</b>: | Health services research                                                                                                                                                                                                                                                                                                                                                                                                                                                                                                                                                                                                                                                                                                                                                                                                                                                                                                                                                                                                                                                  |
| Secondary Subject Heading:      | Research methods, Evidence based practice                                                                                                                                                                                                                                                                                                                                                                                                                                                                                                                                                                                                                                                                                                                                                                                                                                                                                                                                                                                                                                 |
| Keywords:                       | Protocols & guidelines < HEALTH SERVICES ADMINISTRATION & MANAGEMENT, Quality in health care < HEALTH SERVICES ADMINISTRATION & MANAGEMENT, STATISTICS & RESEARCH METHODS                                                                                                                                                                                                                                                                                                                                                                                                                                                                                                                                                                                                                                                                                                                                                                                                                                                                                                 |
|                                 |                                                                                                                                                                                                                                                                                                                                                                                                                                                                                                                                                                                                                                                                                                                                                                                                                                                                                                                                                                                                                                                                           |

SCHOLARONE™  
Manuscripts



I, the Submitting Author has the right to grant and does grant on behalf of all authors of the Work (as defined in the below author licence), an exclusive licence and/or a non-exclusive licence for contributions from authors who are: i) UK Crown employees; ii) where BMJ has agreed a CC-BY licence shall apply, and/or iii) in accordance with the terms applicable for US Federal Government officers or employees acting as part of their official duties; on a worldwide, perpetual, irrevocable, royalty-free basis to BMJ Publishing Group Ltd ("BMJ") its licensees and where the relevant Journal is co-owned by BMJ to the co-owners of the Journal, to publish the Work in this journal and any other BMJ products and to exploit all rights, as set out in our [licence](#).

The Submitting Author accepts and understands that any supply made under these terms is made by BMJ to the Submitting Author unless you are acting as an employee on behalf of your employer or a postgraduate student of an affiliated institution which is paying any applicable article publishing charge ("APC") for Open Access articles. Where the Submitting Author wishes to make the Work available on an Open Access basis (and intends to pay the relevant APC), the terms of reuse of such Open Access shall be governed by a Creative Commons licence – details of these licences and which [Creative Commons](#) licence will apply to this Work are set out in our licence referred to above.

Other than as permitted in any relevant BMJ Author's Self Archiving Policies, I confirm this Work has not been accepted for publication elsewhere, is not being considered for publication elsewhere and does not duplicate material already published. I confirm all authors consent to publication of this Work and authorise the granting of this licence.

1  
2  
3 **Identifying optimal frameworks to implement or evaluate digital health interventions: A**  
4 **scoping review protocol**  
5  
6  
7  
8

9 Charlene Soobiah<sup>1,2</sup>, Madeline Cooper<sup>1</sup>, Vanessa Kishimoto<sup>1</sup>, R. Sacha Bhatia<sup>1</sup>, Ted Scott<sup>3,4</sup>,  
10 Shelagh Maloney<sup>5</sup>, Darren Larsen<sup>1,6</sup>, Harindra C. Wijeyesundera<sup>7</sup>, Jennifer Zelmer<sup>8</sup>, Carolyn  
11 Steele Gray<sup>2,9</sup>, Laura Desveaux<sup>1,2\*</sup>  
12  
13  
14

15  
16  
17  
18 Affiliations:  
19

20 1 Women's College Hospital Institute for Health System Solutions and Virtual Care, 76  
21 Grenville Street, Toronto ON M5S 1B2  
22

23 2 University of Toronto Institute of Health Policy Management & Evaluation, 155 College,  
24 Toronto, ON M5T 3M6  
25

26 3 Hamilton Health Sciences, King West, 293 Wellington, Suite 120, Hamilton ON, L8L 8E7  
27

28 4 McMaster University School of Nursing, 1280 Main St West, Hamilton ON, L8L 8E7  
29

30 5 Canada Health Infoway, 150 King Street West, Suite 1300 Toronto, ON M5H 1J9  
31

32 6 Ontario MD, 150 Bloor St. West, Suite 900, Toronto, ON M5S 3C1  
33

34 7 Schulich Heart Center, Sunnybrook Health Sciences Centre, 2075 Bayview Avenue, Toronto,  
35 ON M4N 3M5  
36

37 8 Canadian Foundation for Healthcare Improvement, 150 Kent Street, Suite 200, Ottawa ON,  
38 K1P 0E4  
39

40 9 Bridgepoint Collaboratory for Research and Innovation, Lunenfeld-Tanenbaum Research  
41 Institute, Sinai Health System 1 Bridgepoint Dr. Toronto, ON M4M 2B5  
42

43 **\*Corresponding author:** Dr. Laura Desveaux, [laura.desveaux@wchospital.ca](mailto:laura.desveaux@wchospital.ca), 416-323-6400  
44 x4302, 76 Grenville Street Toronto, Ont. M5S 1B2  
45  
46  
47  
48  
49  
50  
51  
52  
53  
54  
55  
56  
57

1  
2  
3  
4  
5  
6  
7  
8  
9  
10  
11  
12  
13  
14  
15  
16  
17  
18  
19  
20  
21  
22  
23  
24  
25  
26  
27  
28  
29  
30  
31  
32  
33  
34  
35  
36  
37  
38  
39  
40  
41  
42  
43  
44  
45  
46  
47  
48  
49  
50  
51  
52  
53  
54  
55  
56  
57  
58  
59  
60

**Keywords:** scoping review, digital health interventions, evaluation frameworks, implementation frameworks

**Word count:** 2415 (main text), 300 (abstract)

For peer review only

## Abstract

**Introduction:** Digital health interventions (DHIs) are defined as health services delivered electronically through formal or informal care. DHIs can range from electronic medical records used by providers to mobile health apps used by consumers. DHIs involve complex interactions between user, technology and the healthcare team, posing challenges for implementation and evaluation. Theoretical or interpretive frameworks are crucial in providing researchers guidance and clarity on implementation or evaluation approaches; however, there is a lack of standardization on which frameworks to use in which contexts. Our goal is to conduct a scoping review to identify frameworks to guide the implementation or evaluation of DHIs.

**Methods and Analysis:** A scoping review will be conducted using methods outlined by the Joanna Briggs Institute Reviewers' Manual and will conform to the PRISMA Extension for Scoping Reviews. Studies will be included if they report on frameworks (i.e., theoretical, interpretive, developmental) that are used to guide either implementation or evaluation of DHIs. Electronic databases, including MEDLINE, EMBASE, CINAHL, and PsychINFO will be searched in addition to grey literature and reference lists of included studies. Citations and full text articles will be screened independently in Covidence after a reliability check among reviewers. We will use qualitative description to summarize findings and focus on how research objectives and type of DHIs are aligned with the frameworks used.

**Ethics and dissemination:** We engaged an advisory panel of digital health knowledge users to provide input at strategic stages of the scoping review to enhance the relevance of findings and inform dissemination activities. Specifically, they will provide feedback on the eligibility criteria, data abstraction elements, interpretation of findings and assist in developing key messages for dissemination. This study does not require ethical review. Findings from review will support decision making when selecting appropriate frameworks to guide the implementation or evaluation of DHIs.

### Strengths and Limitations

- This will be one of the first scoping reviews to identify frameworks to implement or evaluate digital health interventions on a broad scale.
- The study protocol was informed by the Joanna Briggs Institute approach for scoping reviews and adheres to the PRISMA Extension for Scoping Reviews (PRISMA-ScR)
- Digital health knowledge users, such as policymakers, researchers, clinicians, and developers have been engaged in the design and development of the review since its inception to ensure relevance and scope of project.
- This scoping review will not examine the quality of the included studies or the usability of the frameworks, as such our findings will be limited to descriptive syntheses.
- Findings stemming from this review will provide practical guidance for digital health knowledge users and enable them to use evidence informed approaches to select optimal frameworks to implement or evaluate digital health interventions.



## 1 Introduction

2 Frameworks help to systematically organize and link research objectives or constructs, and  
3 provide useful insights in quantitative and qualitative analyses, which can inform interpretation or  
4 decision-making.<sup>1 2</sup> The Medical Research Council (MRC) categorizes frameworks into four  
5 distinct groups: 1) development frameworks, which can model processes and outcomes; 2)  
6 feasibility frameworks, which can guide pilot testing of an intervention; 3) implementation  
7 frameworks to guide evidence into clinical practice; and 4) evaluation frameworks, to determine  
8 intervention effectiveness.<sup>3</sup>

9 A recent scoping review, identified over 159 knowledge translation frameworks to guide  
10 implementation and evaluation of health interventions in clinical practice settings, presenting a  
11 plethora of options for the implementation and evaluation of digital health interventions (DHIs).<sup>4</sup>  
12 Implementation and evaluation frameworks present an opportunity to address gaps relating not  
13 only to whether an intervention works but provide actionable insights for how to support their  
14 uptake in practice.

15 DHIs differ from traditional health interventions such as implementing a new program or  
16 evaluating drug effectiveness. DHIs include any health service or treatment delivered using  
17 technology that aims to facilitate, capture, or exchange knowledge.<sup>5</sup> Examples of DHIs include  
18 electronic medical records, mobile applications or wearable sensors for remote monitoring. DHIs  
19 are complex, differ both in intended functionality (e.g., self-management support versus data  
20 sharing), and intended users (e.g., patients versus providers). DHIs are not static; instead the  
21 interaction between the technology, end-user and the healthcare team and setting is by its nature  
22 dynamic and thus can vary substantially over time.<sup>6</sup> Given the unique sociotechnical aspects of  
23 DHIs, it remains unclear which frameworks can be appropriately applied in this emerging field.

24 This paper outlines the protocol for a scoping review to identify frameworks to guide the  
25 implementation or evaluation of DHIs. Specifically, our objectives are to:

- 26 1. To describe the attributes of existing frameworks that have been used to guide the  
27 implementation or evaluation of DHIs.
- 28 2. Identify the proposed role of each framework, including the constructs and mechanisms  
29 they target.

30 3. Describe how each framework has been applied in primary studies, if applicable.

31 The results of this review will provide practical guidance and support for researchers, clinicians,  
32 policymakers, and developers in selecting the most appropriate framework for DHIs, which will  
33 support evidence-based approaches in relation to implementation and evaluation efforts.

## 34 **Methods and Analysis**

35 We will conduct a scoping review to comprehensively search the literature, ‘map’ the  
36 evidence, and identify gaps in the research knowledge base.<sup>7 8</sup> The study will be conducted using  
37 established methods outlined by the Joanna Briggs Institute Reviewers’ Manual<sup>7</sup> and reporting  
38 will conform to the PRISMA Extension for Scoping Reviews (PRISMA-ScR).<sup>9</sup> This protocol is  
39 registered on Open Science Framework (OSF) and is available at <https://osf.io/8jydm/>. OSF is an  
40 open source platform where researchers can share protocols, data and contributes to transparency  
41 of research.<sup>10</sup>

## 42 **Eligibility Criteria**

43 Studies reporting on the development or application of frameworks (i.e., theoretical or  
44 interpretive) to guide implementation or evaluation of DHIs in healthcare will be included. We  
45 will use the WHO definition of health which encompasses physical, mental and social well-being  
46 and spans across multiple disciplines such as psychology, sociology or medical sciences.<sup>11</sup> DHI  
47 was defined as any health service or treatment delivered using technology that aims to facilitate,  
48 capture, or exchange knowledge (formally or informally).<sup>5</sup> DHI definition was generated from a  
49 search of the literature and consultations with digital health knowledge users, including  
50 policymakers, researchers, clinicians and developers. Implementation frameworks will be  
51 operationalized according to MRC guidance, as frameworks that aim to guide research into  
52 practice, which can include development, feasibility, and dissemination frameworks.<sup>3</sup> Evaluation  
53 frameworks will be defined as frameworks that focus on determining the effectiveness of DHIs,  
54 which includes measuring outcomes and understanding processes or mechanisms of action.<sup>3</sup> No  
55 limitations will be placed on user population, comparators, study design, publication status or  
56 geographic region to enhance the comprehensiveness of our results and avoid unintended  
57 exclusion of relevant studies. Conference abstracts/proceedings and white papers will be included.  
58 We will include studies reported in other languages and use appropriate tools (i.e., Google

1  
2  
3 59 translate, translation services, contact author) to assess inclusion. Commentaries and studies  
4  
5 60 examining mathematical or statistical frameworks will be excluded.  
6

## 7 61 **Information sources**

8  
9  
10 62 An experienced information specialist developed the literature search in consultation with  
11  
12 63 the multidisciplinary research team. The search will be peer reviewed by a second information  
13  
14 64 specialist using the Peer Review of Electronic Search Strategy (PRESS) checklist to ensure the  
15  
16 65 search is comprehensive and maximizes appropriate search terms.<sup>12</sup>

17  
18 66 We will search MEDLINE, EMBASE, CINAHL, and PsychINFO using key words such  
19  
20 67 as ‘digital health’ and ‘framework’. Additional search terms were drawn from multiple disciplines  
21  
22 68 such as psychology, nursing, sociology, and medicine to ensure comprehensiveness. The databases  
23  
24 69 will be searched from inception to present and the search strategy is presented in Appendix 1. We  
25  
26 70 chose not to use the BeHEMoTh (behaviour of interest, health context, exclusions, and models or  
27  
28 71 theory) approach<sup>13</sup> as specified in our OSF registration. Although this approach has been  
29  
30 72 successful in identifying frameworks in knowledge translation,<sup>4</sup> it did not prove to be a feasible  
31  
32 73 approach in our scoping review as it yielded a vast number of citations with limited specificity  
33  
34 74 related to our objectives. We utilized a simplified heuristic, which included identifying DHIs in  
35  
36 75 various healthcare contexts, adding terms for frameworks, and removing exclusions such as animal  
37  
38 76 studies (Appendix 1).

39  
40 77 The search strategy will be supplemented by a search for grey literature using the checklist  
41  
42 78 suggested by the Canadian Agency for Drugs and Technologies in Health (CADTH).<sup>14</sup>  
43  
44 79 Specifically, we will search for white papers or benefit evaluation studies through Health  
45  
46 80 Technology Assessment Agencies such as Agency for Healthcare Research and Quality (AHRQ)  
47  
48 81 and National Institute for Health and Care Excellence (NICE), Canada Infoway and other relevant  
49  
50 82 organizations involved in providing guidance on delivery of healthcare services. We will use  
51  
52 83 keywords such as ‘digital health’, ‘frameworks’, and ‘benefits evaluation’ to refine our  
53  
54 84 supplementary search. In addition, we will also scan reference lists of included studies and conduct  
55  
56 85 a forward citation search (i.e., examine studies that reference the included studies) in Web of  
57  
58 86 Science using the cited reference search feature. This will ensure our approach is comprehensive.

## 59 87 **Eligibility Screening Process**

1  
2  
3 88 Citations obtained from the literature search will be uploaded to Covidence,<sup>15</sup> a systematic  
4  
5 89 review software program which organizes citations, enables screening of citations by multiple  
6  
7 90 reviewers, and identifies discrepancies. We will apply a two-step process for identifying relevant  
8  
9 91 citations. At level 1, titles and abstracts will be assessed using the eligibility criteria (Appendix 2).  
10  
11 92 Studies with abstracts fulfilling criteria will be passed to level 2 where the eligibility criteria will  
12  
13 93 be applied to the full text articles.

14 94 Prior to screening, a pilot test will be completed using a random sample of 10% of citations  
15  
16 95 or full text articles, with the expressed purpose of assessing agreement between reviewers at each  
17  
18 96 level. Specifically, percent agreement will be used to assess agreement among reviewers (inter-  
19  
20 97 rater reliability  $\geq 80\%$  will be considered adequate). If agreement is not reached, a second pilot will  
21  
22 98 be conducted with another random sample of 10%. A third reviewer will mediate any  
23  
24 99 disagreements. Citations and full text articles will be screened in duplicate by two reviewers.

#### 25 100 **Data items and abstraction process**

26  
27 101 Studies fulfilling the eligibility criteria will be abstracted in Excel. We will extract the  
28  
29 102 following study characteristics for the identified frameworks: name, reference, theory associated  
30  
31 103 with framework (if applicable), description of its components or constructs, and its application in  
32  
33 104 research (or stage of research to which it was applied, if applicable). For studies outlining the  
34  
35 105 application of a framework, additional characteristics will be abstracted such as the type of DHI,  
36  
37 106 healthcare setting, method of application, and nature and directionality of the results. We will  
38  
39 107 abstract information such as name of the framework, the role of framework in study (i.e.,  
40  
41 108 development, feasibility/pilot testing, implementation, evaluation), components of the framework  
42  
43 109 that were utilized, type of DHI, the objective of the study (if applicable), and healthcare setting  
44  
45 110 from included studies.

#### 46 111 **Methodological appraisal**

47  
48 112 We will not assess the quality of included articles in the scoping review (consistent with  
49  
50 113 Joanna Briggs Institute Reviewer's Manual<sup>7</sup>) as our purpose is to gain an overview of frameworks  
51  
52 114 used in relation to DHIs and not to assess the quality of their application.

#### 53 54 115 **Ethics and Dissemination**

1  
2  
3 116 This scoping review is focused on published reports and studies of DHI and does not  
4  
5 117 involve patients or primary data collection; as such, no formal ethics approval is required.  
6

7 118 The dissemination plan will be tailored to end-users and will include passive and interactive  
8  
9 119 strategies such as peer reviewed publications, conference events and other network events with  
10  
11 120 digital health knowledge users. To ensure broader reach, we will also disseminate our findings  
12  
13 121 through social media platforms, and public-facing communications such as one-page briefs  
14  
15 122 released on the Women's College Institute for Health Innovation website at Women's College  
16  
17 123 hospital.

### 18 124 **Patient and Public Involvement**

19  
20  
21 125 We employed an integrated knowledge translation strategy to engage digital health  
22  
23 126 knowledge users in the review process to ensure the scope of the project met the needs of various  
24  
25 127 end-users. Knowledge users are defined as individuals who are likely to use the findings to inform  
26  
27 128 health decision making.<sup>2</sup> A priori, we decided to engage senior leaders and policymakers at  
28  
29 129 organizations that promote or support implementation of digital health solutions, as well as  
30  
31 130 researchers, clinicians, and developers evaluating DHIs in real world settings. An advisory panel  
32  
33 131 of digital health knowledge users was established to provide input at strategic phases of the scoping  
34  
35 132 review.

36  
37 133 Potential panelists were identified through organizational networks and were invited to participate  
38  
39 134 via email. Six members agreed to participate (CSG, TS, HCW, JZ, SM, DL) on the advisory panel.  
40  
41 135 Panelists and the research team convened a meeting and discussed the strategic steps and  
42  
43 136 opportunities for involvement and input in the review. Specifically, the advisory panel will support  
44  
45 137 refinement of inclusion criteria, prioritization of data abstraction elements, assist in interpretation  
46  
47 138 of findings and develop dissemination strategies. Panelists have national and international  
48  
49 139 networks that will ensure the scope of the review reflects the knowledge needs of a diverse  
50  
51 140 audience, which is directly in line with the stated aim of providing practical guidance on the  
52  
53 141 selection and application of frameworks for DHIs. As the intended audience of this paper does not  
54  
55 142 include patients and members of the general public, they were not included as part of the advisory  
56  
57 143 panel. The perspectives of patients and the general public will be incorporated through their  
58  
59 144 participation and involvement in the respective studies included as part of this review.  
60

## 145 **Analysis**

146 Included studies will be summarized using qualitative description, an approach that seeks  
147 to create an understanding of phenomenon through accessing the meanings ascribed by authors.<sup>16</sup>  
148 Descriptions of individual frameworks will be organized by key categories, including study design,  
149 report type (published vs non-published), methodological approach (i.e. how the framework is  
150 intended to be applied) and application papers (i.e. how the framework has been applied in  
151 practice). We will then synthesize findings by mapping core components of the frameworks and  
152 examining how research objectives and type of DHIs are linked to the framework. Categorization  
153 will use language directly from included studies, where possible, and authors will be contacted  
154 when information is not present or unclear. The advisory panel will guide the synthesis of findings  
155 by providing input on the level of detail abstracted from included articles and provide input on  
156 categorization of frameworks, where appropriate.

## 157 **Strengths and Limitations**

158 To our knowledge, this is the first scoping review to examine the use of frameworks to  
159 guide implementation or evaluation of DHIs on a broad scale. A clear understanding of which  
160 frameworks can be used for development, feasibility, implementation and evaluation of DHIs will  
161 facilitate decision making by making evidence-based approaches available to policymakers,  
162 researchers, clinicians and developers.

163 Given the breadth of this scoping review, we anticipate a few key challenges. The first  
164 relates to the inconsistent and often ill-defined nature of DHIs and frameworks. To be inclusive,  
165 we have defined DHIs broadly as any health intervention that can be delivered utilizing technology  
166 to ensure we capture frameworks that are currently being used across formal (e.g., care delivered  
167 within the walls of a healthcare organization) and informal settings (e.g., direct to consumer  
168 technologies). Moreover, use of the term framework itself also creates challenges. For the purposes  
169 of this scoping review, we have defined a framework as a tool to systematically organize and link  
170 research questions or constructs, but a range of terms are often used synonymously (e.g., models  
171 or processes). To account for this variability, we will include studies reporting on ‘models’ and  
172 work closely with the advisory panel to confirm whether the reported framework aligns with our  
173 *a priori* definition, as well as the needs of relevant digital health knowledge user groups.

1  
2  
3 174 Secondly, we also anticipate challenges searching the literature as a product of inconsistent  
4  
5 175 terminology outlined above. We have constructed our search to balance comprehensiveness and  
6  
7 176 specificity, working closely with an information specialist to ensure the number of citations are  
8  
9 177 focused and feasible. Several iterations of the literature search. Specifically, we added in key words  
10  
11 178 and removed them in a stepwise fashion to understand the impact on specificity and sensitivity of  
12  
13 179 our search. We used a randomized sample of 200 citations and multiple iterations of the literature  
14  
15 180 search were screened using the inclusion criteria Two reviewers screened citations, discrepancies  
16  
17 181 were discussed among the internal research team, and the number of included studies were  
18  
19 182 examined to explore the specificity of search terms. Through this iterative process, we developed  
20  
21 183 our search strategy, which was then peer reviewed using the PRESS checklist; however, we  
22  
23 184 anticipate additional challenges when screening.

24  
25 185 Thirdly, we anticipate challenges arising from poor reporting or limited description, as  
26  
27 186 evidenced by previous studies.<sup>17 18</sup> „ Authors may not provide sufficient details on the frameworks  
28  
29 187 they utilize or their method of application.<sup>19</sup> To mitigate this, we will contact authors to obtain  
30  
31 188 additional information whenever information is missing or unclear.

32  
33 189 Finally, we anticipate that some included frameworks will have a dual purpose of  
34  
35 190 addressing implementation and evaluation or may contain components that lend themselves to both  
36  
37 191 constructs. We will convene with the advisory committee on a quarterly basis to discuss these  
38  
39 192 issues as they arise and will devise the most appropriate plan for analysis through group consensus.

40  
41 193 Overall, identification of frameworks will serve as a guide for researchers, clinicians,  
42  
43 194 policymakers, and developers of DHIs by providing practical guidance on which frameworks may  
44  
45 195 be most appropriate for which objectives (i.e., implementation or evaluation). In parallel, the  
46  
47 196 results will contribute to a more nuanced understanding of how to evaluate and implement DHIs,  
48  
49 197 including the identification and understanding of key constructs.

50  
51  
52  
53  
54  
55  
56  
57  
58  
59  
60 198

199

200 **References:**

- 201 1. Tabak RG, Khoong EC, Chambers DA, et al. Bridging research and practice: models for dissemination  
 202 and implementation research. *Am J Prev Med* 2012;43(3):337-50. doi:  
 203 10.1016/j.amepre.2012.05.024 [published Online First: 2012/08/18]
- 204 2. Straus S, Tetroe, J., Graham, ID.,. Knowledge Translation in Health Care: Moving from Evidence to  
 205 Practice 2014.
- 206 3. Craig P, Dieppe P, Macintyre S, et al. Developing and evaluating complex interventions: the new  
 207 Medical Research Council guidance. *International journal of nursing studies* 2013;50(5):587-92.  
 208 doi: 10.1016/j.ijnurstu.2012.09.010
- 209 4. Strifler L, Cardoso R, McGowan J, et al. Scoping review identifies significant number of knowledge  
 210 translation theories, models, and frameworks with limited use. *J Clin Epidemiol* 2018;100:92-  
 211 102. doi: 10.1016/j.jclinepi.2018.04.008 [published Online First: 2018/04/17]
- 212 5. Murray E, Hekler EB, Andersson G, et al. Evaluating Digital Health Interventions: Key Questions and  
 213 Approaches. *Am J Prev Med* 2016;51(5):843-51. doi: 10.1016/j.amepre.2016.06.008 [published  
 214 Online First: 2016/10/18]
- 215 6. Shaw J. AP, Desveaux L., Conejo Palma D., Stamenova V., Jamieson T., Yang R., Bhatia RS.,  
 216 Bhattacharyya O., . Beyond "implementation": digital health innovation and service design. *NPJ*  
 217 *Digital Medicine* 2018;1:48.
- 218 7. Aromataris E. MZ, editor. *Joanna Briggs Institute Reviewer's Manual*. The Joanna Briggs Institute,  
 219 2017.
- 220 8. Arksey H, O'Malley, L. Scoping studies: towards a methodological framework. *International Journal of*  
 221 *Social Research Methodology* 2005;8(1):19-32.
- 222 9. Tricco AC, Lillie E, Zarin W, et al. PRISMA Extension for Scoping Reviews (PRISMA-ScR): Checklist and  
 223 Explanation. *Ann Intern Med* 2018;169(7):467-73. doi: 10.7326/M18-0850 [published Online  
 224 First: 2018/09/05]
- 225 10. Foster E, Deardorff. Open Science Framework (OSF). *J Med Libr Assoc* 2017;105(2):203–06.
- 226 11.. Constitution of the World Health Organization. In: World Health Organization: Basic documents.  
 227 45th ed. Geneva: World Health Organization; 2005 [Available from:  
 228 <https://apps.who.int/gb/bd/>] accessed June 8, 2020
- 229 12. McGowan J, Sampson M, Salzwedel DM, et al. PRESS Peer Review of Electronic Search Strategies:  
 230 2015 Guideline Statement. *J Clin Epidemiol* 2016;75:40-6. doi: 10.1016/j.jclinepi.2016.01.021  
 231 [published Online First: 2016/03/24]
- 232 13. Booth A, Carroll C. Systematic searching for theory to inform systematic reviews: is it feasible? Is it  
 233 desirable? *Health Info Libr J* 2015;32(3):220-35. doi: 10.1111/hir.12108 [published Online First:  
 234 2015/06/23]
- 235 14. Canadian Agency for Drugs and Technologies in Health (CADTH). Grey Matters: A practical search  
 236 tool for evidence-based medicine. 2013 [Available from: [http://www.cadth.ca/resources/grey-](http://www.cadth.ca/resources/grey-matters)  
 237 [matters](http://www.cadth.ca/resources/grey-matters).]
- 238 15. Covidence. 2019 [Available from: <https://www.covidence.org/home>.]
- 239 16. Sandelowski M. What's in a name? Qualitative description revisited. *Research in Nursing Health*  
 240 2010;33(1):77-84.
- 241 17. Glasziou P, Meats E, Heneghan C, et al. What is missing from descriptions of treatment in trials and  
 242 reviews? *BMJ* 2008;336(7659):1472-4. doi: 10.1136/bmj.39590.732037.47 [published Online  
 243 First: 2008/06/28]
- 244 18. Hoffmann TC, Eructi C, Glasziou PP. Poor description of non-pharmacological interventions: analysis  
 245 of consecutive sample of randomised trials. *BMJ* 2013;347:f3755. doi: 10.1136/bmj.f3755  
 246 [published Online First: 2013/09/12]



- 1  
2  
3 247 19. Breuer E, Lee L, De Silva M, et al. Using theory of change to design and evaluate public health  
4 248 interventions: a systematic review. *Implement Sci* 2016;11:63. doi: 10.1186/s13012-016-0422-6  
5 249 [published Online First: 2016/05/08]  
6  
7  
8  
9  
10  
11  
12  
13  
14  
15  
16  
17  
18  
19  
20  
21  
22  
23  
24  
25  
26  
27  
28  
29  
30  
31  
32  
33  
34  
35  
36  
37  
38  
39  
40  
41  
42  
43  
44  
45  
46  
47  
48  
49  
50  
51  
52  
53  
54  
55  
56  
57  
58  
59  
60

For peer review only

1  
2  
3 251 **Authors' Contributions:**  
4

5 252 CS, LD conceived and developed the study. CS drafted the manuscript. MC, VK, RSB, TS, SM,  
6  
7 253 DL, HCW, JZ, CGS, and LD reviewed and edited the manuscript.  
8

9  
10 254 **Funding:**  
11

12 255 This research received no specific grant from any funding agency in the public, commercial or  
13 256 not-for-profit sectors.  
14

15 257 **Conflict of Interest:**  
16

17 258 The authors have no conflicts of interest to report.  
18  
19

20 259 **Acknowledgement:**  
21

22 260 We would like to thank Becky Skidmore, and Anne Dabrowski for their assistance with  
23  
24 261 generating the literature search, as well as Beatrice Choremis, who helped screen a few  
25  
26 262 preliminary citations.  
27  
28  
29  
30  
31  
32  
33  
34  
35  
36  
37  
38  
39  
40  
41  
42  
43  
44  
45  
46  
47  
48  
49  
50  
51  
52  
53  
54  
55  
56  
57  
58  
59  
60

## 1 Appendix 1. Primary Literature Search in Medline

2 Database: Ovid MEDLINE: Epub Ahead of Print, In-Process & Other Non-Indexed Citations, Ovid  
 3 MEDLINE® Daily and Ovid MEDLINE® <1946-Present>  
 4 Search Strategy:  
 5 -----  
 6 1 exp Telemedicine/ (25845)  
 7 2 (telemed\* or tele-med\* or telecare or tele-care or teleconsult\* or tele-consult\* or telehealth\* or  
 8 tele-health\* or telemonitor\* or tele-monitor\* or telerehab\* or tele-rehab\*).tw,kf. (17416)  
 9 3 (ehealth\* or e-health\* or mhealth\* or m-health\* or emental health\* or e-mental health\* or  
 10 epsychiatr\* or e-psychiatr\* or epsychol\* or e-psychol\* or etherap\* or e-therap\*).tw,kf. (10073)  
 11 4 (emedicine or e-medicine\*).tw,kf. (78)  
 12 5 (mobile health\* or mobile care or mobile medicine).tw,kf. (3793)  
 13 6 (digital\* adj3 (medic\* or care or health\* or healthcare or health-care)).tw,kf. (3065)  
 14 7 (digital\* adj3 (consult\* or diagnos\* or intervention? or manag\* or monitor\* or palliat\* or rehab\* or  
 15 surger\* or surgic\* or therap\* or treatment?)).tw,kf. (5936)  
 16 8 (remote\* adj3 (consult\* or diagnos\* or intervention? or manag\* or monitor\* or palliat\* or rehab\* or  
 17 surger\* or surgic\* or therap\* or treatment?)).tw,kf. (6643)  
 18 9 Monitoring, Ambulatory/ (7806)  
 19 10 ((outpatient\* or out-patient\* or ambulator\* or home? or homebased or home-based) adj3  
 20 (manag\* or monitor\*)).tw,kf. (24341)  
 21 11 exp Biomedical Technology/ (13203)  
 22 12 ((biomedic\* or bio-medic\* or health\* or healthcare or health care or medical) adj  
 23 technolog\*).tw,kf. (13535)  
 24 13 Medical Informatics/ or Medical Informatics Applications/ (13622)  
 25 14 ((health\* or medical) adj informatic\*).tw,kf. (5056)  
 26 15 exp Therapy, Computer-Assisted/ (59720)  
 27 16 ((internet\* or app or apps or computer\* or cyber\* or digital\* or e-application? or e-mail\* or email\*  
 28 or electronic mail\* or iphone? or i-phone? or (mobile adj2 application?) or mobile-based or mobile  
 29 phone? or online or smarthome\* or smart-home\* or smartphone\* or smart phone\* or technolog\* or  
 30 webbased or web-based or webdeliver\* or web-deliver\* or "web 2.0") adj3 care).tw,kf. (8049)  
 31 17 ((internet\* or app or apps or computer\* or cyber\* or digital\* or e-application? or e-mail\* or email\*  
 32 or electronic mail\* or iphone? or i-phone? or (mobile adj2 application?) or mobile-based or mobile  
 33 phone? or online or smarthome\* or smart-home\* or smartphone\* or smart phone\* or technolog\* or  
 34 webbased or web-based or webdeliver\* or web-deliver\* or "web 2.0") adj3 health\*).tw,kf. (27319)  
 35 18 ((internet\* or app or apps or computer\* or cyber\* or digital\* or e-application? or e-mail\* or email\*  
 36 or electronic mail\* or iphone? or i-phone? or (mobile adj2 application?) or mobile-based or mobile  
 37 phone? or online or smarthome\* or smart-home\* or smartphone\* or smart phone\* or technolog\* or  
 38 webbased or web-based or webdeliver\* or web-deliver\* or "web 2.0") adj3 (healthcare or health  
 39 care)).tw,kf. (6410)  
 40 19 ((internet\* or app or apps or computer\* or cyber\* or digital\* or e-application? or e-mail\* or email\*  
 41 or electronic mail\* or iphone? or i-phone? or (mobile adj2 application?) or mobile-based or mobile  
 42 phone? or online or smarthome\* or smart-home\* or smartphone\* or smart phone\* or technolog\* or  
 43 webbased or web-based or webdeliver\* or web-deliver\* or "web 2.0") adj3 (medicine or medical)).tw,kf.  
 44 (19800)  
 45 20 ((internet\* or app or apps or computer\* or cyber\* or digital\* or e-application? or e-mail\* or email\*  
 46 or electronic mail\* or iphone? or i-phone? or (mobile adj2 application?) or mobile-based or mobile

1  
2  
3 47 phone? or online or smarthome\* or smart-home\* or smartphone\* or smart phone\* or technolog\* or  
4 48 webbased or web-based or webdeliver\* or web-deliver\* or "web 2.0" adj3 consult\*).tw,kf. (1299)  
5 49 21 ((internet\* or app or apps or computer\* or cyber\* or digital\* or e-application? or e-mail\* or email\*  
6 50 or electronic mail\* or iphone? or i-phone? or (mobile adj2 application?) or mobile-based or mobile  
7 51 phone? or online or smarthome\* or smart-home\* or smartphone\* or smart phone\* or technolog\* or  
8 52 webbased or web-based or webdeliver\* or web-deliver\* or "web 2.0" adj3 diagnos\*).tw,kf. (13043)  
9 53 22 ((internet\* or app or apps or computer\* or cyber\* or digital\* or e-application? or e-mail\* or email\*  
10 54 or electronic mail\* or iphone? or i-phone? or (mobile adj2 application?) or mobile-based or mobile  
11 55 phone? or online or smarthome\* or smart-home\* or smartphone\* or smart phone\* or technolog\* or  
12 56 webbased or web-based or webdeliver\* or web-deliver\* or "web 2.0" adj3 intervention?).tw,kf. (9139)  
13 57 23 ((internet\* or app or apps or computer\* or cyber\* or digital\* or e-application? or e-mail\* or email\*  
14 58 or electronic mail\* or iphone? or i-phone? or (mobile adj2 application?) or mobile-based or mobile  
15 59 phone? or online or smarthome\* or smart-home\* or smartphone\* or smart phone\* or technolog\* or  
16 60 webbased or web-based or webdeliver\* or web-deliver\* or "web 2.0" adj3 manag\*).tw,kf. (7259)  
17 61 24 ((internet\* or app or apps or computer\* or cyber\* or digital\* or e-application? or e-mail\* or email\*  
18 62 or electronic mail\* or iphone? or i-phone? or (mobile adj2 application?) or mobile-based or mobile  
19 63 phone? or online or smarthome\* or smart-home\* or smartphone\* or smart phone\* or technolog\* or  
20 64 webbased or web-based or webdeliver\* or web-deliver\* or "web 2.0" adj3 monitor\*).tw,kf. (8457)  
21 65 25 ((internet\* or app or apps or computer\* or cyber\* or digital\* or e-application? or e-mail\* or email\*  
22 66 or electronic mail\* or iphone? or i-phone? or (mobile adj2 application?) or mobile-based or mobile  
23 67 phone? or online or smarthome\* or smart-home\* or smartphone\* or smart phone\* or technolog\* or  
24 68 webbased or web-based or webdeliver\* or web-deliver\* or "web 2.0" adj3 palliat\*).tw,kf. (133)  
25 69 26 ((internet\* or app or apps or computer\* or cyber\* or digital\* or e-application? or e-mail\* or email\*  
26 70 or electronic mail\* or iphone? or i-phone? or (mobile adj2 application?) or mobile-based or mobile  
27 71 phone? or online or smarthome\* or smart-home\* or smartphone\* or smart phone\* or technolog\* or  
28 72 webbased or web-based or webdeliver\* or web-deliver\* or "web 2.0" adj3 rehab\*).tw,kf. (1264)  
29 73 27 ((internet\* or app or apps or computer\* or cyber\* or digital\* or e-application? or e-mail\* or email\*  
30 74 or electronic mail\* or iphone? or i-phone? or (mobile adj2 application?) or mobile-based or mobile  
31 75 phone? or online or smarthome\* or smart-home\* or smartphone\* or smart phone\* or technolog\* or  
32 76 webbased or web-based or webdeliver\* or web-deliver\* or "web 2.0" adj3 (surger\* or surgic\*).tw,kf.  
33 77 (7354)  
34 78 28 ((internet\* or app or apps or computer\* or cyber\* or digital\* or e-application? or e-mail\* or email\*  
35 79 or electronic mail\* or iphone? or i-phone? or (mobile adj2 application?) or mobile-based or mobile  
36 80 phone? or online or smarthome\* or smart-home\* or smartphone\* or smart phone\* or technolog\* or  
37 81 webbased or web-based or webdeliver\* or web-deliver\* or "web 2.0" adj3 therap\*).tw,kf. (6817)  
38 82 29 ((internet\* or app or apps or computer\* or cyber\* or digital\* or e-application? or e-mail\* or email\*  
39 83 or electronic mail\* or iphone? or i-phone? or (mobile adj2 application?) or mobile-based or mobile  
40 84 phone? or online or smarthome\* or smart-home\* or smartphone\* or smart phone\* or technolog\* or  
41 85 webbased or web-based or webdeliver\* or web-deliver\* or "web 2.0" adj3 treatment?).tw,kf. (10336)  
42 86 30 Wearable Electronic Devices/ (1321)  
43 87 31 wearable?.tw,kf. (10007)  
44 88 32 or/1-31 (253918)  
45 89 33 exp \*Delivery of Health Care/ (619520)  
46 90 34 exp Computers/ (76307)  
47 91 35 Electronic Mail/ (2573)  
48 92 36 Internet/ (69753)  
49 93 37 Telecommunications/ (4741)

1  
2  
3 94 38 (internet\* or app or apps or computer\* or cyber\* or digital\* or e-application? or e-mail\* or email\*  
4 95 or electronic mail\* or iphone? or i-phone? or (mobile adj2 application?) or mobile-based or mobile  
5 96 phone? or online or smarthome\* or smart-home\* or smartphone\* or smart phone\* or technolog\* or  
6 97 webbased or web-based or webdeliver\* or web-deliver\*).tw,kf. (995758)  
7  
8 98 39 33 and (34 or 35 or 36 or 37 or 38) (50511)  
9 99 40 32 or 39 [DIGITAL HEALTH APPLICATIONS] (282776)  
10 100 41 (evaluat\* adj3 (design\* or frame or frames or framework? or guid\* or model or models or schem\*  
11 101 or strateg\* or theor\*).tw,kf. (105535)  
12 102 42 (apprais\* adj3 (frame or frames or framework? or model or models or theor\*).tw,kf. (927)  
13 103 43 (apprais\* adj3 (design\* or guid\* or schem\* or strateg\*).ti,kf. (313)  
14 104 44 (assess\* adj3 (frame or frames or framework? or model or models or theor\*).tw,kf. (47798)  
15 105 45 (assess\* adj3 (design\* or guid\* or schem\* or strateg\*).ti,kf. (3366)  
16 106 46 (implement\* adj3 (design\* or frame or frames or framework? or guid\* or model or models or  
17 107 schem\* or strateg\* or theor\*).tw,kf. (57152)  
18 108 47 (evidence-based adj (frame or frames or framework? or model or models or theor\*).tw,kf. (769)  
19 109 48 (evidence-based adj (design\* or guid\* or schem\* or strateg\*).ti,kf. (1559)  
20 110 49 (service adj (frame or frames or framework? or model or models or theor\*).tw,kf. (2165)  
21 111 50 (service adj (design\* or guid\* or schem\* or strateg\*).ti,kf. (201)  
22 112 51 or/41-50 [EVALUATION/IMPLEMENTATION FRAMEWORKS] (212588)  
23 113 52 40 and 51 [DIGITAL HEALTH - EVALUATION/IMPLEMENTATION FRAMEWORKS] (8974)  
24 114 53 exp Animals/ not Humans/ (4614915)  
25 115 54 52 not 53 [ANIMAL-ONLY REMOVED] (8859)  
26  
27  
28 116  
29 117 \*\*\*\*\*  
30  
31  
32  
33  
34  
35  
36  
37  
38  
39  
40  
41  
42  
43  
44  
45  
46  
47  
48  
49  
50  
51  
52  
53  
54  
55  
56  
57  
58  
59  
60

## 1 Appendix 2. Eligibility Criteria

### Question 1: Does this study include humans?

- 2 a. If yes, **INCLUDE**
- 3 b. **EXCLUDE** animal studies/models, non-humans or vertebrae studies

### Question 2: Does this study examine the use of a digital health intervention?

- 4 a. **INCLUDE** studies focusing on digital health interventions as their primary component of  
5 the study. A digital health intervention is any health intervention that is being delivered  
6 by technology and can include the following items: ehealth, virtual healthcare,  
7 smartphone apps aimed at healthcare issue, wearable technologies, telemedicine or health  
8 education interventions delivered digitally.
- 9 b. **EXCLUDE** interventions that are focused on creating scales, checklists or other metrics  
10 that are not a digital health intervention.
  - 11 • Example of an exclude: a cross-sectional study to create a checklist for  
12 conducting health technology assessments.

### Question 3: Does this study use a framework to implement or evaluate the digital intervention?

- 13 a. **INCLUDE** studies that focus on frameworks. Frameworks can help guide evaluation  
14 questions by systematically organizing and linking research questions when evaluating a  
15 digital intervention.
- 16 b. **EXCLUDE** studies that discuss checklists, theoretical mathematical models or statistical  
17 models.

### Question 4: Is this an experimental study, qualitative study, or review?

- 19 a. **INCLUDE** any study design (i.e., randomized controlled trials, observational studies,  
20 cross-sectional studies, qualitative studies, systematic review)
- 21 b. **EXCLUDE** studies if it's an editorial (without any primary data), letter to the editor or  
22 commentary.

## Preferred Reporting Items for Systematic reviews and Meta-Analyses extension for Scoping Reviews (PRISMA-ScR) Checklist

| SECTION                                               | ITEM | PRISMA-ScR CHECKLIST ITEM                                                                                                                                                                                                                                                                                  | REPORTED ON PAGE # |
|-------------------------------------------------------|------|------------------------------------------------------------------------------------------------------------------------------------------------------------------------------------------------------------------------------------------------------------------------------------------------------------|--------------------|
| <b>TITLE</b>                                          |      |                                                                                                                                                                                                                                                                                                            |                    |
| Title                                                 | 1    | Identify the report as a scoping review.                                                                                                                                                                                                                                                                   |                    |
| <b>ABSTRACT</b>                                       |      |                                                                                                                                                                                                                                                                                                            |                    |
| Structured summary                                    | 2    | Provide a structured summary that includes (as applicable): background, objectives, eligibility criteria, sources of evidence, charting methods, results, and conclusions that relate to the review questions and objectives.                                                                              |                    |
| <b>INTRODUCTION</b>                                   |      |                                                                                                                                                                                                                                                                                                            |                    |
| Rationale                                             | 3    | Describe the rationale for the review in the context of what is already known. Explain why the review questions/objectives lend themselves to a scoping review approach.                                                                                                                                   |                    |
| Objectives                                            | 4    | Provide an explicit statement of the questions and objectives being addressed with reference to their key elements (e.g., population or participants, concepts, and context) or other relevant key elements used to conceptualize the review questions and/or objectives.                                  |                    |
| <b>METHODS</b>                                        |      |                                                                                                                                                                                                                                                                                                            |                    |
| Protocol and registration                             | 5    | Indicate whether a review protocol exists; state if and where it can be accessed (e.g., a Web address); and if available, provide registration information, including the registration number.                                                                                                             |                    |
| Eligibility criteria                                  | 6    | Specify characteristics of the sources of evidence used as eligibility criteria (e.g., years considered, language, and publication status), and provide a rationale.                                                                                                                                       |                    |
| Information sources*                                  | 7    | Describe all information sources in the search (e.g., databases with dates of coverage and contact with authors to identify additional sources), as well as the date the most recent search was executed.                                                                                                  |                    |
| Search                                                | 8    | Present the full electronic search strategy for at least 1 database, including any limits used, such that it could be repeated.                                                                                                                                                                            |                    |
| Selection of sources of evidence†                     | 9    | State the process for selecting sources of evidence (i.e., screening and eligibility) included in the scoping review.                                                                                                                                                                                      |                    |
| Data charting process‡                                | 10   | Describe the methods of charting data from the included sources of evidence (e.g., calibrated forms or forms that have been tested by the team before their use, and whether data charting was done independently or in duplicate) and any processes for obtaining and confirming data from investigators. |                    |
| Data items                                            | 11   | List and define all variables for which data were sought and any assumptions and simplifications made.                                                                                                                                                                                                     |                    |
| Critical appraisal of individual sources of evidence§ | 12   | If done, provide a rationale for conducting a critical appraisal of included sources of evidence; describe the methods used and how this information was used in any data synthesis (if appropriate).                                                                                                      |                    |
| Synthesis of results                                  | 13   | Describe the methods of handling and summarizing the data that were charted.                                                                                                                                                                                                                               |                    |



| SECTION                                       | ITEM | PRISMA-ScR CHECKLIST ITEM                                                                                                                                                                       | REPORTED ON PAGE # |
|-----------------------------------------------|------|-------------------------------------------------------------------------------------------------------------------------------------------------------------------------------------------------|--------------------|
| <b>RESULTS</b>                                |      |                                                                                                                                                                                                 |                    |
| Selection of sources of evidence              | 14   | Give numbers of sources of evidence screened, assessed for eligibility, and included in the review, with reasons for exclusions at each stage, ideally using a flow diagram.                    |                    |
| Characteristics of sources of evidence        | 15   | For each source of evidence, present characteristics for which data were charted and provide the citations.                                                                                     |                    |
| Critical appraisal within sources of evidence | 16   | If done, present data on critical appraisal of included sources of evidence (see item 12).                                                                                                      |                    |
| Results of individual sources of evidence     | 17   | For each included source of evidence, present the relevant data that were charted that relate to the review questions and objectives.                                                           |                    |
| Synthesis of results                          | 18   | Summarize and/or present the charting results as they relate to the review questions and objectives.                                                                                            |                    |
| <b>DISCUSSION</b>                             |      |                                                                                                                                                                                                 |                    |
| Summary of evidence                           | 19   | Summarize the main results (including an overview of concepts, themes, and types of evidence available), link to the review questions and objectives, and consider the relevance to key groups. |                    |
| Limitations                                   | 20   | Discuss the limitations of the scoping review process.                                                                                                                                          |                    |
| Conclusions                                   | 21   | Provide a general interpretation of the results with respect to the review questions and objectives, as well as potential implications and/or next steps.                                       |                    |
| <b>FUNDING</b>                                |      |                                                                                                                                                                                                 |                    |
| Funding                                       | 22   | Describe sources of funding for the included sources of evidence, as well as sources of funding for the scoping review. Describe the role of the funders of the scoping review.                 |                    |

JBI = Joanna Briggs Institute; PRISMA-ScR = Preferred Reporting Items for Systematic reviews and Meta-Analyses extension for Scoping Reviews.

\* Where *sources of evidence* (see second footnote) are compiled from, such as bibliographic databases, social media platforms, and Web sites.

† A more inclusive/heterogeneous term used to account for the different types of evidence or data sources (e.g., quantitative and/or qualitative research, expert opinion, and policy documents) that may be eligible in a scoping review as opposed to only studies. This is not to be confused with *information sources* (see first footnote).

‡ The frameworks by Arksey and O'Malley (6) and Levac and colleagues (7) and the JBI guidance (4, 5) refer to the process of data extraction in a scoping review as data charting.

§ The process of systematically examining research evidence to assess its validity, results, and relevance before using it to inform a decision. This term is used for items 12 and 19 instead of "risk of bias" (which is more applicable to systematic reviews of interventions) to include and acknowledge the various sources of evidence that may be used in a scoping review (e.g., quantitative and/or qualitative research, expert opinion, and policy document).

From: Tricco AC, Lillie E, Zarin W, O'Brien KK, Colquhoun H, Levac D, et al. PRISMA Extension for Scoping Reviews (PRISMA-ScR): Checklist and Explanation. *Ann Intern Med.* 2018;169:467–473. doi: [10.7326/M18-0850](https://doi.org/10.7326/M18-0850).





# BMJ Open

## Identifying optimal frameworks to implement or evaluate digital health interventions: A scoping review protocol

|                                 |                                                                                                                                                                                                                                                                                                                                                                                                                                                                                                                                                                                                                                                                                                                                                                                                                                                                                                                                                                                                                                                                            |
|---------------------------------|----------------------------------------------------------------------------------------------------------------------------------------------------------------------------------------------------------------------------------------------------------------------------------------------------------------------------------------------------------------------------------------------------------------------------------------------------------------------------------------------------------------------------------------------------------------------------------------------------------------------------------------------------------------------------------------------------------------------------------------------------------------------------------------------------------------------------------------------------------------------------------------------------------------------------------------------------------------------------------------------------------------------------------------------------------------------------|
| Journal:                        | <i>BMJ Open</i>                                                                                                                                                                                                                                                                                                                                                                                                                                                                                                                                                                                                                                                                                                                                                                                                                                                                                                                                                                                                                                                            |
| Manuscript ID                   | bmjopen-2020-037643.R3                                                                                                                                                                                                                                                                                                                                                                                                                                                                                                                                                                                                                                                                                                                                                                                                                                                                                                                                                                                                                                                     |
| Article Type:                   | Protocol                                                                                                                                                                                                                                                                                                                                                                                                                                                                                                                                                                                                                                                                                                                                                                                                                                                                                                                                                                                                                                                                   |
| Date Submitted by the Author:   | 29-Jun-2020                                                                                                                                                                                                                                                                                                                                                                                                                                                                                                                                                                                                                                                                                                                                                                                                                                                                                                                                                                                                                                                                |
| Complete List of Authors:       | Soobiah, Charlene ; Women's College Hospital, Women's College Hospital Institute for Health System Solutions and Virtual Care<br>Cooper, Madeline; Women's College Hospital, Women's College Hospital Institute for Health System Solutions and Virtual Care<br>Kishimoto, Vanessa; Women's College Hospital, Institute for Health System Solutions and Virtual Care<br>Bhatia, R.; Women's College Hospital, Institute for Health System Solutions and Virtual Care<br>Scott, Ted; Hamilton Health Sciences; McMaster University<br>Maloney, Shelagh; Canada Health Infoway<br>Larsen, Darren; Women's College Hospital, Institute for Health System Solutions and Virtual Care; OntarioMD<br>Wijeysundera, Harindra; Sunnybrook Health Sciences Centre, Zelmer, Jennifer; Canadian Foundation for Healthcare Improvement<br>SteeleGray, Carolyn; Sinai Health System, Bridgepoint Collaboratory for Research and Innovation, Lunenfeld-Tanenbaum Research Institute<br>Desveaux, Laura; Women's College Hospital, Institute for Health System Solutions and Virtual Care |
| <b>Primary Subject Heading</b>: | Health services research                                                                                                                                                                                                                                                                                                                                                                                                                                                                                                                                                                                                                                                                                                                                                                                                                                                                                                                                                                                                                                                   |
| Secondary Subject Heading:      | Research methods, Evidence based practice                                                                                                                                                                                                                                                                                                                                                                                                                                                                                                                                                                                                                                                                                                                                                                                                                                                                                                                                                                                                                                  |
| Keywords:                       | Protocols & guidelines < HEALTH SERVICES ADMINISTRATION & MANAGEMENT, Quality in health care < HEALTH SERVICES ADMINISTRATION & MANAGEMENT, STATISTICS & RESEARCH METHODS                                                                                                                                                                                                                                                                                                                                                                                                                                                                                                                                                                                                                                                                                                                                                                                                                                                                                                  |
|                                 |                                                                                                                                                                                                                                                                                                                                                                                                                                                                                                                                                                                                                                                                                                                                                                                                                                                                                                                                                                                                                                                                            |

SCHOLARONE™  
Manuscripts



I, the Submitting Author has the right to grant and does grant on behalf of all authors of the Work (as defined in the below author licence), an exclusive licence and/or a non-exclusive licence for contributions from authors who are: i) UK Crown employees; ii) where BMJ has agreed a CC-BY licence shall apply, and/or iii) in accordance with the terms applicable for US Federal Government officers or employees acting as part of their official duties; on a worldwide, perpetual, irrevocable, royalty-free basis to BMJ Publishing Group Ltd ("BMJ") its licensees and where the relevant Journal is co-owned by BMJ to the co-owners of the Journal, to publish the Work in this journal and any other BMJ products and to exploit all rights, as set out in our [licence](#).

The Submitting Author accepts and understands that any supply made under these terms is made by BMJ to the Submitting Author unless you are acting as an employee on behalf of your employer or a postgraduate student of an affiliated institution which is paying any applicable article publishing charge ("APC") for Open Access articles. Where the Submitting Author wishes to make the Work available on an Open Access basis (and intends to pay the relevant APC), the terms of reuse of such Open Access shall be governed by a Creative Commons licence – details of these licences and which [Creative Commons](#) licence will apply to this Work are set out in our licence referred to above.

Other than as permitted in any relevant BMJ Author's Self Archiving Policies, I confirm this Work has not been accepted for publication elsewhere, is not being considered for publication elsewhere and does not duplicate material already published. I confirm all authors consent to publication of this Work and authorise the granting of this licence.

1  
2  
3 **Identifying optimal frameworks to implement or evaluate digital health interventions: A**  
4 **scoping review protocol**  
5  
6  
7  
8

9  
10 Charlene Soobiah<sup>1,2</sup>, Madeline Cooper<sup>1</sup>, Vanessa Kishimoto<sup>1</sup>, R. Sacha Bhatia<sup>1</sup>, Ted Scott<sup>3,4</sup>,  
11 Shelagh Maloney<sup>5</sup>, Darren Larsen<sup>1,6</sup>, Harindra C. Wijeyesundera<sup>7</sup>, Jennifer Zelmer<sup>8</sup>, Carolyn  
12 Steele Gray<sup>2,9</sup>, Laura Desveaux<sup>1,2\*</sup>  
13  
14

15  
16  
17  
18 Affiliations:  
19

20 1 Women's College Hospital Institute for Health System Solutions and Virtual Care, 76  
21 Grenville Street, Toronto ON M5S 1B2  
22

23  
24 2 University of Toronto Institute of Health Policy Management & Evaluation, 155 College,  
25 Toronto, ON M5T 3M6  
26

27  
28 3 Hamilton Health Sciences, King West, 293 Wellington, Suite 120, Hamilton ON, L8L 8E7  
29

30  
31 4 McMaster University School of Nursing, 1280 Main St West, Hamilton ON, L8L 8E7  
32

33  
34 5 Canada Health Infoway, 150 King Street West, Suite 1300 Toronto, ON M5H 1J9  
35

36  
37 6 Ontario MD, 150 Bloor St. West, Suite 900, Toronto, ON M5S 3C1  
38

39  
40 7 Schulich Heart Center, Sunnybrook Health Sciences Centre, 2075 Bayview Avenue, Toronto,  
41 ON M4N 3M5  
42

43  
44 8 Canadian Foundation for Healthcare Improvement, 150 Kent Street, Suite 200, Ottawa ON,  
45 K1P 0E4  
46

47  
48 9 Bridgepoint Collaboratory for Research and Innovation, Lunenfeld-Tanenbaum Research  
49 Institute, Sinai Health System 1 Bridgepoint Dr. Toronto, ON M4M 2B5  
50

51 **\*Corresponding author:** Dr. Laura Desveaux, [laura.desveaux@wchospital.ca](mailto:laura.desveaux@wchospital.ca), 416-323-6400  
52 x4302 , 76 Grenville Street Toronto, Ont. M5S 1B2  
53  
54  
55  
56  
57

1  
2  
3  
4  
5  
6  
7  
8  
9  
10  
11  
12  
13  
14  
15  
16  
17  
18  
19  
20  
21  
22  
23  
24  
25  
26  
27  
28  
29  
30  
31  
32  
33  
34  
35  
36  
37  
38  
39  
40  
41  
42  
43  
44  
45  
46  
47  
48  
49  
50  
51  
52  
53  
54  
55  
56  
57  
58  
59  
60

**Keywords:** scoping review, digital health interventions, evaluation frameworks, implementation frameworks

**Word count:** 2415 (main text), 300 (abstract)

For peer review only

## Abstract

**Introduction:** Digital health interventions (DHIs) are defined as health services delivered electronically through formal or informal care. DHIs can range from electronic medical records used by providers to mobile health apps used by consumers. DHIs involve complex interactions between user, technology and the healthcare team, posing challenges for implementation and evaluation. Theoretical or interpretive frameworks are crucial in providing researchers guidance and clarity on implementation or evaluation approaches; however, there is a lack of standardization on which frameworks to use in which contexts. Our goal is to conduct a scoping review to identify frameworks to guide the implementation or evaluation of DHIs.

**Methods and Analysis:** A scoping review will be conducted using methods outlined by the Joanna Briggs Institute Reviewers' Manual and will conform to the PRISMA Extension for Scoping Reviews. Studies will be included if they report on frameworks (i.e., theoretical, interpretive, developmental) that are used to guide either implementation or evaluation of DHIs. Electronic databases, including MEDLINE, EMBASE, CINAHL, and PsychINFO will be searched in addition to grey literature and reference lists of included studies. Citations and full text articles will be screened independently in Covidence after a reliability check among reviewers. We will use qualitative description to summarize findings and focus on how research objectives and type of DHIs are aligned with the frameworks used.

**Ethics and dissemination:** We engaged an advisory panel of digital health knowledge users to provide input at strategic stages of the scoping review to enhance the relevance of findings and inform dissemination activities. Specifically, they will provide feedback on the eligibility criteria, data abstraction elements, interpretation of findings and assist in developing key messages for dissemination. This study does not require ethical review. Findings from review will support decision making when selecting appropriate frameworks to guide the implementation or evaluation of DHIs.

### Strengths and Limitations

- To our knowledge, this is the first scoping review to identify frameworks to implement or evaluate digital health interventions on a broad scale.
- The study protocol was informed by rigorous and established methods as suggested by the Joanna Briggs Institute approach for scoping reviews and adheres to the PRISMA Extension for Scoping Reviews (PRISMA-ScR)
- Digital health knowledge users, such as policymakers, researchers, clinicians, and developers have been engaged in the design and development of the review since its inception to ensure relevance and scope of project.
- This scoping review will not examine the usability of the frameworks, as such our findings will be limited to descriptive syntheses.
- Findings stemming from this review will provide practical guidance for digital health knowledge users and enable them to use evidence informed approaches to select optimal frameworks to implement or evaluate digital health interventions.

## 1 Introduction

2 Frameworks help to systematically organize and link research objectives or constructs, and  
3 provide useful insights in quantitative and qualitative analyses, which can inform interpretation or  
4 decision-making.<sup>1 2</sup> The Medical Research Council (MRC) categorizes frameworks into four  
5 distinct groups: 1) development frameworks, which can model processes and outcomes; 2)  
6 feasibility frameworks, which can guide pilot testing of an intervention; 3) implementation  
7 frameworks to guide evidence into clinical practice; and 4) evaluation frameworks, to determine  
8 intervention effectiveness.<sup>3</sup>

9 A recent scoping review, identified over 159 knowledge translation frameworks to guide  
10 implementation and evaluation of health interventions in clinical practice settings, presenting a  
11 plethora of options for the implementation and evaluation of digital health interventions (DHIs).<sup>4</sup>  
12 Implementation and evaluation frameworks present an opportunity to address gaps relating not  
13 only to whether an intervention works but provide actionable insights for how to support their  
14 uptake in practice.

15 DHIs differ from traditional health interventions such as implementing a new program or  
16 evaluating drug effectiveness. DHIs include any health service or treatment delivered using  
17 technology that aims to facilitate, capture, or exchange knowledge.<sup>5</sup> Examples of DHIs include  
18 electronic medical records, mobile applications or wearable sensors for remote monitoring. DHIs  
19 are complex, differ both in intended functionality (e.g., self-management support versus data  
20 sharing), and intended users (e.g., patients versus providers). DHIs are not static; instead the  
21 interaction between the technology, end-user and the healthcare team and setting is by its nature  
22 dynamic and thus can vary substantially over time.<sup>6</sup> Given the unique sociotechnical aspects of  
23 DHIs, it remains unclear which frameworks can be appropriately applied in this emerging field.

24 This paper outlines the protocol for a scoping review to identify frameworks to guide the  
25 implementation or evaluation of DHIs. Specifically, our objectives are to:

- 26 1. To describe the attributes of existing frameworks that have been used to guide the  
27 implementation or evaluation of DHIs.
- 28 2. Identify the proposed role of each framework, including the constructs and mechanisms  
29 they target.

30 3. Describe how each framework has been applied in primary studies, if applicable.

31 The results of this review will provide practical guidance and support for researchers, clinicians,  
32 policymakers, and developers in selecting the most appropriate framework for DHIs, which will  
33 support evidence-based approaches in relation to implementation and evaluation efforts.

## 34 **Methods and Analysis**

35 We will conduct a scoping review to comprehensively search the literature, ‘map’ the  
36 evidence, and identify gaps in the research knowledge base.<sup>7 8</sup> The study will be conducted using  
37 established methods outlined by the Joanna Briggs Institute Reviewers’ Manual<sup>7</sup> and reporting  
38 will conform to the PRISMA Extension for Scoping Reviews (PRISMA-ScR).<sup>9</sup> This protocol is  
39 registered on Open Science Framework (OSF) and is available at <https://osf.io/8jydm/>. OSF is an  
40 open source platform where researchers can share protocols, data and contributes to transparency  
41 of research.<sup>10</sup>

## 42 **Eligibility Criteria**

43 Studies reporting on the development or application of frameworks (i.e., theoretical or  
44 interpretive) to guide implementation or evaluation of DHIs in healthcare will be included. We  
45 will use the WHO definition of health which encompasses physical, mental and social well-being  
46 and spans across multiple disciplines such as psychology, sociology or medical sciences.<sup>11</sup> DHI  
47 was defined as any health service or treatment delivered using technology that aims to facilitate,  
48 capture, or exchange knowledge (formally or informally).<sup>5</sup> DHI definition was generated from a  
49 search of the literature and consultations with digital health knowledge users, including  
50 policymakers, researchers, clinicians and developers. Implementation frameworks will be  
51 operationalized according to MRC guidance, as frameworks that aim to guide research into  
52 practice, which can include development, feasibility, and dissemination frameworks.<sup>3</sup> Evaluation  
53 frameworks will be defined as frameworks that focus on determining the effectiveness of DHIs,  
54 which includes measuring outcomes and understanding processes or mechanisms of action.<sup>3</sup> No  
55 limitations will be placed on user population, comparators, study design, publication status or  
56 geographic region to enhance the comprehensiveness of our results and avoid unintended  
57 exclusion of relevant studies. Conference abstracts/proceedings and white papers will be included.  
58 We will include studies reported in other languages and use appropriate tools (i.e., Google



1  
2  
3 59 translate, translation services, contact author) to assess inclusion. Commentaries and studies  
4  
5 60 examining mathematical or statistical frameworks will be excluded.  
6

## 7 61 **Information sources**

8  
9  
10 62 An experienced information specialist developed the literature search in consultation with  
11  
12 63 the multidisciplinary research team. The search will be peer reviewed by a second information  
13  
14 64 specialist using the Peer Review of Electronic Search Strategy (PRESS) checklist to ensure the  
15  
16 65 search is comprehensive and maximizes appropriate search terms.<sup>12</sup>

17  
18 66 We will search MEDLINE, EMBASE, CINAHL, and PsychINFO using key words such  
19  
20 67 as ‘digital health’ and ‘framework’. Additional search terms were drawn from multiple disciplines  
21  
22 68 such as psychology, nursing, sociology, and medicine to ensure comprehensiveness. The databases  
23  
24 69 will be searched from inception to present and the search strategy is presented in Appendix 1. We  
25  
26 70 chose not to use the BeHEMoTh (behaviour of interest, health context, exclusions, and models or  
27  
28 71 theory) approach<sup>13</sup> as specified in our OSF registration. Although this approach has been  
29  
30 72 successful in identifying frameworks in knowledge translation,<sup>4</sup> it did not prove to be a feasible  
31  
32 73 approach in our scoping review as it yielded a vast number of citations with limited specificity  
33  
34 74 related to our objectives. We utilized a simplified heuristic, which included identifying DHIs in  
35  
36 75 various healthcare contexts, adding terms for frameworks, and removing exclusions such as animal  
37  
38 76 studies (Appendix 1).

39  
40 77 The search strategy will be supplemented by a search for grey literature using the checklist  
41  
42 78 suggested by the Canadian Agency for Drugs and Technologies in Health (CADTH).<sup>14</sup>  
43  
44 79 Specifically, we will search for white papers or benefit evaluation studies through Health  
45  
46 80 Technology Assessment Agencies such as Agency for Healthcare Research and Quality (AHRQ)  
47  
48 81 and National Institute for Health and Care Excellence (NICE), Canada Infoway and other relevant  
49  
50 82 organizations involved in providing guidance on delivery of healthcare services. We will use  
51  
52 83 keywords such as ‘digital health’, ‘frameworks’, and ‘benefits evaluation’ to refine our  
53  
54 84 supplementary search. In addition, we will also scan reference lists of included studies and conduct  
55  
56 85 a forward citation search (i.e., examine studies that reference the included studies) in Web of  
57  
58 86 Science using the cited reference search feature. This will ensure our approach is comprehensive.

## 59 87 **Eligibility Screening Process**

1  
2  
3 88 Citations obtained from the literature search will be uploaded to Covidence,<sup>15</sup> a systematic  
4  
5 89 review software program which organizes citations, enables screening of citations by multiple  
6  
7 90 reviewers, and identifies discrepancies. We will apply a two-step process for identifying relevant  
8  
9 91 citations. At level 1, titles and abstracts will be assessed using the eligibility criteria (Appendix 2).  
10  
11 92 Studies with abstracts fulfilling criteria will be passed to level 2 where the eligibility criteria will  
12  
13 93 be applied to the full text articles.

14 94 Prior to screening, a pilot test will be completed using a random sample of 10% of citations  
15  
16 95 or full text articles, with the expressed purpose of assessing agreement between reviewers at each  
17  
18 96 level. Specifically, percent agreement will be used to assess agreement among reviewers (inter-  
19  
20 97 rater reliability  $\geq 80\%$  will be considered adequate). If agreement is not reached, a second pilot will  
21  
22 98 be conducted with another random sample of 10%. A third reviewer will mediate any  
23  
24 99 disagreements. Citations and full text articles will be screened in duplicate by two reviewers.

#### 25 100 **Data items and abstraction process**

26  
27 101 Studies fulfilling the eligibility criteria will be abstracted in Excel. We will extract the  
28  
29 102 following study characteristics for the identified frameworks: name, reference, theory associated  
30  
31 103 with framework (if applicable), description of its components or constructs, and its application in  
32  
33 104 research (or stage of research to which it was applied, if applicable). For studies outlining the  
34  
35 105 application of a framework, additional characteristics will be abstracted such as the type of DHI,  
36  
37 106 healthcare setting, method of application, and nature and directionality of the results. We will  
38  
39 107 abstract information such as name of the framework, the role of framework in study (i.e.,  
40  
41 108 development, feasibility/pilot testing, implementation, evaluation), components of the framework  
42  
43 109 that were utilized, type of DHI, the objective of the study (if applicable), and healthcare setting  
44  
45 110 from included studies.

#### 46 111 **Methodological appraisal**

47  
48 112 We will not assess the quality of included articles in the scoping review (consistent with  
49  
50 113 Joanna Briggs Institute Reviewer's Manual<sup>7</sup>) as our purpose is to gain an overview of frameworks  
51  
52 114 used in relation to DHIs and not to assess the quality of their application.

#### 53 54 115 **Ethics and Dissemination**

1  
2  
3 116 This scoping review is focused on published reports and studies of DHI and does not  
4  
5 117 involve patients or primary data collection; as such, no formal ethics approval is required.  
6

7 118 The dissemination plan will be tailored to end-users and will include passive and interactive  
8  
9 119 strategies such as peer reviewed publications, conference events and other network events with  
10  
11 120 digital health knowledge users. To ensure broader reach, we will also disseminate our findings  
12  
13 121 through social media platforms, and public-facing communications such as one-page briefs  
14  
15 122 released on the Women's College Institute for Health Innovation website at Women's College  
16  
17 123 hospital.

### 18 124 **Patient and Public Involvement**

19  
20  
21 125 We employed an integrated knowledge translation strategy to engage digital health  
22  
23 126 knowledge users in the review process to ensure the scope of the project met the needs of various  
24  
25 127 end-users. Knowledge users are defined as individuals who are likely to use the findings to inform  
26  
27 128 health decision making.<sup>2</sup> A priori, we decided to engage senior leaders and policymakers at  
28  
29 129 organizations that promote or support implementation of digital health solutions, as well as  
30  
31 130 researchers, clinicians, and developers evaluating DHIs in real world settings. An advisory panel  
32  
33 131 of digital health knowledge users was established to provide input at strategic phases of the scoping  
34  
35 132 review.

36  
37 133 Potential panelists were identified through organizational networks and were invited to  
38  
39 134 participate via email. Six members agreed to participate (CSG, TS, HCW, JZ, SM, DL) on the  
40  
41 135 advisory panel. Panelists and the research team convened a meeting and discussed the strategic  
42  
43 136 steps and opportunities for involvement and input in the review. Specifically, the advisory panel  
44  
45 137 will support refinement of inclusion criteria, prioritization of data abstraction elements, assist in  
46  
47 138 interpretation of findings and develop dissemination strategies. Panelists have national and  
48  
49 139 international networks that will ensure the scope of the review reflects the knowledge needs of a  
50  
51 140 diverse audience, which is directly in line with the stated aim of providing practical guidance on  
52  
53 141 the selection and application of frameworks for DHIs. As the intended audience of this paper does  
54  
55 142 not include patients and members of the general public, they were not included as part of the  
56  
57 143 advisory panel. The perspectives of patients and the general public will be incorporated through  
58  
59 144 their participation and involvement in the respective studies included as part of this review.  
60

## 145 **Analysis**

146 Included studies will be summarized using qualitative description, an approach that seeks  
147 to create an understanding of phenomenon through accessing the meanings ascribed by authors.<sup>16</sup>  
148 Descriptions of individual frameworks will be organized by key categories, including study design,  
149 report type (published vs non-published), methodological approach (i.e. how the framework is  
150 intended to be applied) and application papers (i.e. how the framework has been applied in  
151 practice). We will then synthesize findings by mapping core components of the frameworks and  
152 examining how research objectives and type of DHIs are linked to the framework. Categorization  
153 will use language directly from included studies, where possible, and authors will be contacted  
154 when information is not present or unclear. The advisory panel will guide the synthesis of findings  
155 by providing input on the level of detail abstracted from included articles and provide input on  
156 categorization of frameworks, where appropriate.

## 157 **Strengths and Limitations**

158 To our knowledge, this is the first scoping review to examine the use of frameworks to  
159 guide implementation or evaluation of DHIs on a broad scale. The protocol was generated using  
160 established methods for the conduct of scoping reviews and informed by input from digital health  
161 knowledge users to define scope and ensure the relevance of the project. A clear understanding of  
162 which frameworks can be used for development, feasibility, implementation and evaluation of  
163 DHIs will facilitate decision making by making evidence-based approaches available to  
164 policymakers, clinicians and developers. Additionally, this guidance will support researchers in  
165 identifying appropriate frameworks with the goal of establishing consistency across studies,  
166 minimizing duplication, and accelerating scientific progress.

167 Given the breadth of this scoping review, we anticipate a few key challenges. The first  
168 relates to the inconsistent and often ill-defined nature of DHIs and frameworks. To be inclusive,  
169 we have defined DHIs broadly as any health intervention that can be delivered utilizing technology  
170 to ensure we capture frameworks that are currently being used across formal (e.g., care delivered  
171 within the walls of a healthcare organization) and informal settings (e.g., direct to consumer  
172 technologies). Moreover, use of the term framework itself also creates challenges. For the purposes  
173 of this scoping review, we have defined a framework as a tool to systematically organize and link  
174 research questions or constructs, but a range of terms are often used synonymously (e.g., models

1  
2  
3 175 or processes). To account for this variability, we will include studies reporting on ‘models’ and  
4  
5 176 work closely with the advisory panel to confirm whether the reported framework aligns with our  
6  
7 177 *a priori* definition, as well as the needs of relevant digital health knowledge user groups.  
8

9 178 Secondly, we also anticipate challenges searching the literature as a product of inconsistent  
10  
11 179 terminology outlined above. We have constructed our search to balance comprehensiveness and  
12  
13 180 specificity, working closely with an information specialist to ensure the number of citations are  
14  
15 181 focused and feasible. Several iterations of the literature search were conducted, specifically, we  
16  
17 182 added in key words and removed them in a stepwise fashion to understand the impact on specificity  
18  
19 183 and sensitivity of our search. Through this iterative process, we developed our search strategy,  
20  
21 184 which was then peer reviewed using the PRESS checklist; however, we anticipate additional  
22  
23 185 challenges when screening.

24 186 Thirdly, we anticipate challenges arising from poor reporting or limited description, as  
25  
26 187 evidenced by previous studies.<sup>17, 18</sup> Authors may not provide sufficient details on the frameworks  
27  
28 188 they utilize or their method of application.<sup>19</sup> To mitigate this, we will contact authors to obtain  
29  
30 189 additional information whenever information is missing or unclear.

31 190 Finally, we anticipate that some included frameworks will have a dual purpose of  
32  
33 191 addressing implementation and evaluation or may contain components that lend themselves to both  
34  
35 192 constructs. We will convene with the advisory committee on a quarterly basis to discuss these  
36  
37 193 issues as they arise and will devise the most appropriate plan for analysis through group consensus.

38  
39 194 Overall, identification of frameworks will serve as a guide for researchers, clinicians,  
40  
41 195 policymakers, and developers of DHIs by providing practical guidance on which frameworks may  
42  
43 196 be most appropriate for which objectives (i.e., implementation or evaluation). In parallel, the  
44  
45 197 results will contribute to a more nuanced understanding of how to evaluate and implement DHIs,  
46  
47 198 including the identification and understanding of key constructs.

48 199

50 200

201 **References:**

- 202 1. Tabak RG, Khoong EC, Chambers DA, et al. Bridging research and practice: models for dissemination  
 203 and implementation research. *Am J Prev Med* 2012;43(3):337-50. doi:  
 204 10.1016/j.amepre.2012.05.024 [published Online First: 2012/08/18]
- 205 2. Straus S, Tetroe, J., Graham, ID.,. Knowledge Translation in Health Care: Moving from Evidence to  
 206 Practice 2014.
- 207 3. Craig P, Dieppe P, Macintyre S, et al. Developing and evaluating complex interventions: the new  
 208 Medical Research Council guidance. *International journal of nursing studies* 2013;50(5):587-92.  
 209 doi: 10.1016/j.ijnurstu.2012.09.010
- 210 4. Strifler L, Cardoso R, McGowan J, et al. Scoping review identifies significant number of knowledge  
 211 translation theories, models, and frameworks with limited use. *J Clin Epidemiol* 2018;100:92-  
 212 102. doi: 10.1016/j.jclinepi.2018.04.008 [published Online First: 2018/04/17]
- 213 5. Murray E, Hekler EB, Andersson G, et al. Evaluating Digital Health Interventions: Key Questions and  
 214 Approaches. *Am J Prev Med* 2016;51(5):843-51. doi: 10.1016/j.amepre.2016.06.008 [published  
 215 Online First: 2016/10/18]
- 216 6. Shaw J. AP, Desveaux L., Conejo Palma D., Stamenova V., Jamieson T., Yang R., Bhatia RS.,  
 217 Bhattacharyya O., . Beyond "implementation": digital health innovation and service design. *NPJ*  
 218 *Digital Medicine* 2018;1:48.
- 219 7. Aromataris E. MZ, editor. *Joanna Briggs Institute Reviewer's Manual*. The Joanna Briggs Institute,  
 220 2017.
- 221 8. Arksey H, O'Malley, L. Scoping studies: towards a methodological framework. *International Journal of*  
 222 *Social Research Methodology* 2005;8(1):19-32.
- 223 9. Tricco AC, Lillie E, Zarin W, et al. PRISMA Extension for Scoping Reviews (PRISMA-ScR): Checklist and  
 224 Explanation. *Ann Intern Med* 2018;169(7):467-73. doi: 10.7326/M18-0850 [published Online  
 225 First: 2018/09/05]
- 226 10. Foster E, Deardorff. Open Science Framework (OSF). *J Med Libr Assoc* 2017;105(2):203-06.
- 227 11.. Constitution of the World Health Organization. In: World Health Organization: Basic documents.  
 228 45th ed. Geneva: World Health Organization; 2005 [Available from:  
 229 <https://apps.who.int/gb/bd/>] accessed June 8, 2020
- 230 12. McGowan J, Sampson M, Salzwedel DM, et al. PRESS Peer Review of Electronic Search Strategies:  
 231 2015 Guideline Statement. *J Clin Epidemiol* 2016;75:40-6. doi: 10.1016/j.jclinepi.2016.01.021  
 232 [published Online First: 2016/03/24]
- 233 13. Booth A, Carroll C. Systematic searching for theory to inform systematic reviews: is it feasible? Is it  
 234 desirable? *Health Info Libr J* 2015;32(3):220-35. doi: 10.1111/hir.12108 [published Online First:  
 235 2015/06/23]
- 236 14. Canadian Agency for Drugs and Technologies in Health (CADTH). Grey Matters: A practical search  
 237 tool for evidence-based medicine. 2013 [Available from: [http://www.cadth.ca/resources/grey-](http://www.cadth.ca/resources/grey-matters)  
 238 [matters](http://www.cadth.ca/resources/grey-matters)].
- 239 15. Covidence. 2019 [Available from: <https://www.covidence.org/home>].
- 240 16. Sandelowski M. What's in a name? Qualitative description revisited. *Research in Nursing Health*  
 241 2010;33(1):77-84.
- 242 17. Glasziou P, Meats E, Heneghan C, et al. What is missing from descriptions of treatment in trials and  
 243 reviews? *BMJ* 2008;336(7659):1472-4. doi: 10.1136/bmj.39590.732037.47 [published Online  
 244 First: 2008/06/28]
- 245 18. Hoffmann TC, Eructi C, Glasziou PP. Poor description of non-pharmacological interventions: analysis  
 246 of consecutive sample of randomised trials. *BMJ* 2013;347:f3755. doi: 10.1136/bmj.f3755  
 247 [published Online First: 2013/09/12]

- 1  
2  
3 248 19. Breuer E, Lee L, De Silva M, et al. Using theory of change to design and evaluate public health  
4 249 interventions: a systematic review. *Implement Sci* 2016;11:63. doi: 10.1186/s13012-016-0422-6  
5 250 [published Online First: 2016/05/08]  
6  
7  
8  
9  
10  
11  
12  
13  
14  
15  
16  
17  
18  
19  
20  
21  
22  
23  
24  
25  
26  
27  
28  
29  
30  
31  
32  
33  
34  
35  
36  
37  
38  
39  
40  
41  
42  
43  
44  
45  
46  
47  
48  
49  
50  
51  
52  
53  
54  
55  
56  
57  
58  
59  
60

For peer review only

1  
2  
3 252 **Authors' Contributions:**  
4

5 253 CS, LD conceived and developed the study. CS drafted the manuscript. MC, VK, RSB, TS, SM,  
6  
7 254 DL, HCW, JZ, CSG, and LD reviewed and edited the manuscript.  
8

9  
10 255 **Funding:**  
11

12 256 This research received no specific grant from any funding agency in the public, commercial or  
13 257 not-for-profit sectors.  
14

15 258 **Conflict of Interest:**  
16

17 259 The authors have no conflicts of interest to report.  
18  
19

20 260 **Acknowledgement:**  
21

22 261 We would like to thank Becky Skidmore, and Anne Dabrowski for their assistance with  
23  
24 262 generating the literature search, as well as Beatrice Choremis, who helped screen a few  
25  
26 263 preliminary citations.  
27  
28  
29  
30  
31  
32  
33  
34  
35  
36  
37  
38  
39  
40  
41  
42  
43  
44  
45  
46  
47  
48  
49  
50  
51  
52  
53  
54  
55  
56  
57  
58  
59  
60



## 1 Appendix 1. Primary Literature Search in Medline

2 Database: Ovid MEDLINE: Epub Ahead of Print, In-Process & Other Non-Indexed Citations, Ovid  
3 MEDLINE® Daily and Ovid MEDLINE® <1946-Present>

4 Search Strategy:

5 -----

6 1 exp Telemedicine/ (25845)

7 2 (telemed\* or tele-med\* or telecare or tele-care or teleconsult\* or tele-consult\* or telehealth\* or  
8 tele-health\* or telemonitor\* or tele-monitor\* or telerehab\* or tele-rehab\*).tw,kf. (17416)

9 3 (ehealth\* or e-health\* or mhealth\* or m-health\* or emental health\* or e-mental health\* or  
10 epsychiatr\* or e-psychiatr\* or epsychol\* or e-psychol\* or etherap\* or e-therap\*).tw,kf. (10073)

11 4 (emedicine or e-medicine\*).tw,kf. (78)

12 5 (mobile health\* or mobile care or mobile medicine).tw,kf. (3793)

13 6 (digital\* adj3 (medic\* or care or health\* or healthcare or health-care)).tw,kf. (3065)

14 7 (digital\* adj3 (consult\* or diagnos\* or intervention? or manag\* or monitor\* or palliat\* or rehab\* or  
15 surger\* or surgic\* or therap\* or treatment?)).tw,kf. (5936)

16 8 (remote\* adj3 (consult\* or diagnos\* or intervention? or manag\* or monitor\* or palliat\* or rehab\* or  
17 surger\* or surgic\* or therap\* or treatment?)).tw,kf. (6643)

18 9 Monitoring, Ambulatory/ (7806)

19 10 ((outpatient\* or out-patient\* or ambulator\* or home? or homebased or home-based) adj3  
20 (manag\* or monitor\*)).tw,kf. (24341)

21 11 exp Biomedical Technology/ (13203)

22 12 ((biomedic\* or bio-medic\* or health\* or healthcare or health care or medical) adj  
23 technolog\*).tw,kf. (13535)

24 13 Medical Informatics/ or Medical Informatics Applications/ (13622)

25 14 ((health\* or medical) adj informatic\*).tw,kf. (5056)

26 15 exp Therapy, Computer-Assisted/ (59720)

27 16 ((internet\* or app or apps or computer\* or cyber\* or digital\* or e-application? or e-mail\* or email\*  
28 or electronic mail\* or iphone? or i-phone? or (mobile adj2 application?) or mobile-based or mobile  
29 phone? or online or smarthome\* or smart-home\* or smartphone\* or smart phone\* or technolog\* or  
30 webbased or web-based or webdeliver\* or web-deliver\* or "web 2.0") adj3 care).tw,kf. (8049)

31 17 ((internet\* or app or apps or computer\* or cyber\* or digital\* or e-application? or e-mail\* or email\*  
32 or electronic mail\* or iphone? or i-phone? or (mobile adj2 application?) or mobile-based or mobile  
33 phone? or online or smarthome\* or smart-home\* or smartphone\* or smart phone\* or technolog\* or  
34 webbased or web-based or webdeliver\* or web-deliver\* or "web 2.0") adj3 health\*).tw,kf. (27319)

35 18 ((internet\* or app or apps or computer\* or cyber\* or digital\* or e-application? or e-mail\* or email\*  
36 or electronic mail\* or iphone? or i-phone? or (mobile adj2 application?) or mobile-based or mobile  
37 phone? or online or smarthome\* or smart-home\* or smartphone\* or smart phone\* or technolog\* or  
38 webbased or web-based or webdeliver\* or web-deliver\* or "web 2.0") adj3 (healthcare or health  
39 care)).tw,kf. (6410)

40 19 ((internet\* or app or apps or computer\* or cyber\* or digital\* or e-application? or e-mail\* or email\*  
41 or electronic mail\* or iphone? or i-phone? or (mobile adj2 application?) or mobile-based or mobile  
42 phone? or online or smarthome\* or smart-home\* or smartphone\* or smart phone\* or technolog\* or  
43 webbased or web-based or webdeliver\* or web-deliver\* or "web 2.0") adj3 (medicine or medical)).tw,kf.  
44 (19800)

45 20 ((internet\* or app or apps or computer\* or cyber\* or digital\* or e-application? or e-mail\* or email\*  
46 or electronic mail\* or iphone? or i-phone? or (mobile adj2 application?) or mobile-based or mobile

1  
2  
3 47 phone? or online or smarthome\* or smart-home\* or smartphone\* or smart phone\* or technolog\* or  
4 48 webbased or web-based or webdeliver\* or web-deliver\* or "web 2.0" adj3 consult\*).tw,kf. (1299)  
5 49 21 ((internet\* or app or apps or computer\* or cyber\* or digital\* or e-application? or e-mail\* or email\*  
6 50 or electronic mail\* or iphone? or i-phone? or (mobile adj2 application?) or mobile-based or mobile  
7 51 phone? or online or smarthome\* or smart-home\* or smartphone\* or smart phone\* or technolog\* or  
8 52 webbased or web-based or webdeliver\* or web-deliver\* or "web 2.0" adj3 diagnos\*).tw,kf. (13043)  
9 53 22 ((internet\* or app or apps or computer\* or cyber\* or digital\* or e-application? or e-mail\* or email\*  
10 54 or electronic mail\* or iphone? or i-phone? or (mobile adj2 application?) or mobile-based or mobile  
11 55 phone? or online or smarthome\* or smart-home\* or smartphone\* or smart phone\* or technolog\* or  
12 56 webbased or web-based or webdeliver\* or web-deliver\* or "web 2.0" adj3 intervention?).tw,kf. (9139)  
13 57 23 ((internet\* or app or apps or computer\* or cyber\* or digital\* or e-application? or e-mail\* or email\*  
14 58 or electronic mail\* or iphone? or i-phone? or (mobile adj2 application?) or mobile-based or mobile  
15 59 phone? or online or smarthome\* or smart-home\* or smartphone\* or smart phone\* or technolog\* or  
16 60 webbased or web-based or webdeliver\* or web-deliver\* or "web 2.0" adj3 manag\*).tw,kf. (7259)  
17 61 24 ((internet\* or app or apps or computer\* or cyber\* or digital\* or e-application? or e-mail\* or email\*  
18 62 or electronic mail\* or iphone? or i-phone? or (mobile adj2 application?) or mobile-based or mobile  
19 63 phone? or online or smarthome\* or smart-home\* or smartphone\* or smart phone\* or technolog\* or  
20 64 webbased or web-based or webdeliver\* or web-deliver\* or "web 2.0" adj3 monitor\*).tw,kf. (8457)  
21 65 25 ((internet\* or app or apps or computer\* or cyber\* or digital\* or e-application? or e-mail\* or email\*  
22 66 or electronic mail\* or iphone? or i-phone? or (mobile adj2 application?) or mobile-based or mobile  
23 67 phone? or online or smarthome\* or smart-home\* or smartphone\* or smart phone\* or technolog\* or  
24 68 webbased or web-based or webdeliver\* or web-deliver\* or "web 2.0" adj3 palliat\*).tw,kf. (133)  
25 69 26 ((internet\* or app or apps or computer\* or cyber\* or digital\* or e-application? or e-mail\* or email\*  
26 70 or electronic mail\* or iphone? or i-phone? or (mobile adj2 application?) or mobile-based or mobile  
27 71 phone? or online or smarthome\* or smart-home\* or smartphone\* or smart phone\* or technolog\* or  
28 72 webbased or web-based or webdeliver\* or web-deliver\* or "web 2.0" adj3 rehab\*).tw,kf. (1264)  
29 73 27 ((internet\* or app or apps or computer\* or cyber\* or digital\* or e-application? or e-mail\* or email\*  
30 74 or electronic mail\* or iphone? or i-phone? or (mobile adj2 application?) or mobile-based or mobile  
31 75 phone? or online or smarthome\* or smart-home\* or smartphone\* or smart phone\* or technolog\* or  
32 76 webbased or web-based or webdeliver\* or web-deliver\* or "web 2.0" adj3 (surger\* or surgic\*).tw,kf.  
33 77 (7354)  
34 78 28 ((internet\* or app or apps or computer\* or cyber\* or digital\* or e-application? or e-mail\* or email\*  
35 79 or electronic mail\* or iphone? or i-phone? or (mobile adj2 application?) or mobile-based or mobile  
36 80 phone? or online or smarthome\* or smart-home\* or smartphone\* or smart phone\* or technolog\* or  
37 81 webbased or web-based or webdeliver\* or web-deliver\* or "web 2.0" adj3 therap\*).tw,kf. (6817)  
38 82 29 ((internet\* or app or apps or computer\* or cyber\* or digital\* or e-application? or e-mail\* or email\*  
39 83 or electronic mail\* or iphone? or i-phone? or (mobile adj2 application?) or mobile-based or mobile  
40 84 phone? or online or smarthome\* or smart-home\* or smartphone\* or smart phone\* or technolog\* or  
41 85 webbased or web-based or webdeliver\* or web-deliver\* or "web 2.0" adj3 treatment?).tw,kf. (10336)  
42 86 30 Wearable Electronic Devices/ (1321)  
43 87 31 wearable?.tw,kf. (10007)  
44 88 32 or/1-31 (253918)  
45 89 33 exp \*Delivery of Health Care/ (619520)  
46 90 34 exp Computers/ (76307)  
47 91 35 Electronic Mail/ (2573)  
48 92 36 Internet/ (69753)  
49 93 37 Telecommunications/ (4741)

1  
2  
3 94 38 (internet\* or app or apps or computer\* or cyber\* or digital\* or e-application? or e-mail\* or email\*  
4 95 or electronic mail\* or iphone? or i-phone? or (mobile adj2 application?) or mobile-based or mobile  
5 96 phone? or online or smarthome\* or smart-home\* or smartphone\* or smart phone\* or technolog\* or  
6 97 webbased or web-based or webdeliver\* or web-deliver\*).tw,kf. (995758)  
7  
8 98 39 33 and (34 or 35 or 36 or 37 or 38) (50511)  
9 99 40 32 or 39 [DIGITAL HEALTH APPLICATIONS] (282776)  
10 100 41 (evaluat\* adj3 (design\* or frame or frames or framework? or guid\* or model or models or schem\*  
11 101 or strateg\* or theor\*).tw,kf. (105535)  
12 102 42 (apprais\* adj3 (frame or frames or framework? or model or models or theor\*).tw,kf. (927)  
13 103 43 (apprais\* adj3 (design\* or guid\* or schem\* or strateg\*).ti,kf. (313)  
14 104 44 (assess\* adj3 (frame or frames or framework? or model or models or theor\*).tw,kf. (47798)  
15 105 45 (assess\* adj3 (design\* or guid\* or schem\* or strateg\*).ti,kf. (3366)  
16 106 46 (implement\* adj3 (design\* or frame or frames or framework? or guid\* or model or models or  
17 107 schem\* or strateg\* or theor\*).tw,kf. (57152)  
18 108 47 (evidence-based adj (frame or frames or framework? or model or models or theor\*).tw,kf. (769)  
19 109 48 (evidence-based adj (design\* or guid\* or schem\* or strateg\*).ti,kf. (1559)  
20 110 49 (service adj (frame or frames or framework? or model or models or theor\*).tw,kf. (2165)  
21 111 50 (service adj (design\* or guid\* or schem\* or strateg\*).ti,kf. (201)  
22 112 51 or/41-50 [EVALUATION/IMPLEMENTATION FRAMEWORKS] (212588)  
23 113 52 40 and 51 [DIGITAL HEALTH - EVALUATION/IMPLEMENTATION FRAMEWORKS] (8974)  
24 114 53 exp Animals/ not Humans/ (4614915)  
25 115 54 52 not 53 [ANIMAL-ONLY REMOVED] (8859)  
26  
27  
28 116  
29 117 \*\*\*\*\*  
30  
31  
32  
33  
34  
35  
36  
37  
38  
39  
40  
41  
42  
43  
44  
45  
46  
47  
48  
49  
50  
51  
52  
53  
54  
55  
56  
57  
58  
59  
60

## Appendix 2. Eligibility Criteria

Question 1: Does this study include humans?

- a. If yes, include
- b. Exclude animal studies/models, non-human or vertebrate studies

Question 2: Does this study examine the use of a digital health intervention?

- a. Include studies focusing on digital health interventions as their primary component of the study. A digital health intervention is any health intervention that is being delivered by technology and can include the following items: e-health, virtual healthcare, smartphone apps aimed at healthcare issue, wearable technologies, telemedicine or health education interventions delivered digitally.
- b. Exclude interventions that are focused on creating scales, checklists or other metrics that are not a digital health intervention. Example of an excluded study: a cross-sectional study to create a checklist for conducting health technology assessments.

Question 3: Does this study use a framework to implement or evaluate the digital intervention?

- a. Include studies that focus on frameworks. Frameworks can help guide evaluation questions by systematically organizing and linking research questions when evaluating a digital intervention.
- b. Exclude studies that focus on theoretical mathematical models or statistical models or simulations.

Question 4: Is this an empirical study, qualitative study, a review, or grey literature?

- a. Include any study design (i.e., randomized controlled trials, observational studies, cross sectional studies, qualitative studies, systematic reviews), regardless of publication status. Note we will also be including grey literature such as reports, working papers, government documents, and white papers (when applicable).
- b. Exclude studies if an editorial, letter to the editor (without primary data) or commentaries.

## Preferred Reporting Items for Systematic reviews and Meta-Analyses extension for Scoping Reviews (PRISMA-ScR) Checklist

| SECTION                                               | ITEM | PRISMA-ScR CHECKLIST ITEM                                                                                                                                                                                                                                                                                  | REPORTED ON PAGE # |
|-------------------------------------------------------|------|------------------------------------------------------------------------------------------------------------------------------------------------------------------------------------------------------------------------------------------------------------------------------------------------------------|--------------------|
| <b>TITLE</b>                                          |      |                                                                                                                                                                                                                                                                                                            |                    |
| Title                                                 | 1    | Identify the report as a scoping review.                                                                                                                                                                                                                                                                   |                    |
| <b>ABSTRACT</b>                                       |      |                                                                                                                                                                                                                                                                                                            |                    |
| Structured summary                                    | 2    | Provide a structured summary that includes (as applicable): background, objectives, eligibility criteria, sources of evidence, charting methods, results, and conclusions that relate to the review questions and objectives.                                                                              |                    |
| <b>INTRODUCTION</b>                                   |      |                                                                                                                                                                                                                                                                                                            |                    |
| Rationale                                             | 3    | Describe the rationale for the review in the context of what is already known. Explain why the review questions/objectives lend themselves to a scoping review approach.                                                                                                                                   |                    |
| Objectives                                            | 4    | Provide an explicit statement of the questions and objectives being addressed with reference to their key elements (e.g., population or participants, concepts, and context) or other relevant key elements used to conceptualize the review questions and/or objectives.                                  |                    |
| <b>METHODS</b>                                        |      |                                                                                                                                                                                                                                                                                                            |                    |
| Protocol and registration                             | 5    | Indicate whether a review protocol exists; state if and where it can be accessed (e.g., a Web address); and if available, provide registration information, including the registration number.                                                                                                             |                    |
| Eligibility criteria                                  | 6    | Specify characteristics of the sources of evidence used as eligibility criteria (e.g., years considered, language, and publication status), and provide a rationale.                                                                                                                                       |                    |
| Information sources*                                  | 7    | Describe all information sources in the search (e.g., databases with dates of coverage and contact with authors to identify additional sources), as well as the date the most recent search was executed.                                                                                                  |                    |
| Search                                                | 8    | Present the full electronic search strategy for at least 1 database, including any limits used, such that it could be repeated.                                                                                                                                                                            |                    |
| Selection of sources of evidence†                     | 9    | State the process for selecting sources of evidence (i.e., screening and eligibility) included in the scoping review.                                                                                                                                                                                      |                    |
| Data charting process‡                                | 10   | Describe the methods of charting data from the included sources of evidence (e.g., calibrated forms or forms that have been tested by the team before their use, and whether data charting was done independently or in duplicate) and any processes for obtaining and confirming data from investigators. |                    |
| Data items                                            | 11   | List and define all variables for which data were sought and any assumptions and simplifications made.                                                                                                                                                                                                     |                    |
| Critical appraisal of individual sources of evidence§ | 12   | If done, provide a rationale for conducting a critical appraisal of included sources of evidence; describe the methods used and how this information was used in any data synthesis (if appropriate).                                                                                                      |                    |
| Synthesis of results                                  | 13   | Describe the methods of handling and summarizing the data that were charted.                                                                                                                                                                                                                               |                    |

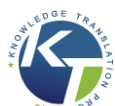

| SECTION                                       | ITEM | PRISMA-ScR CHECKLIST ITEM                                                                                                                                                                       | REPORTED ON PAGE # |
|-----------------------------------------------|------|-------------------------------------------------------------------------------------------------------------------------------------------------------------------------------------------------|--------------------|
| <b>RESULTS</b>                                |      |                                                                                                                                                                                                 |                    |
| Selection of sources of evidence              | 14   | Give numbers of sources of evidence screened, assessed for eligibility, and included in the review, with reasons for exclusions at each stage, ideally using a flow diagram.                    |                    |
| Characteristics of sources of evidence        | 15   | For each source of evidence, present characteristics for which data were charted and provide the citations.                                                                                     |                    |
| Critical appraisal within sources of evidence | 16   | If done, present data on critical appraisal of included sources of evidence (see item 12).                                                                                                      |                    |
| Results of individual sources of evidence     | 17   | For each included source of evidence, present the relevant data that were charted that relate to the review questions and objectives.                                                           |                    |
| Synthesis of results                          | 18   | Summarize and/or present the charting results as they relate to the review questions and objectives.                                                                                            |                    |
| <b>DISCUSSION</b>                             |      |                                                                                                                                                                                                 |                    |
| Summary of evidence                           | 19   | Summarize the main results (including an overview of concepts, themes, and types of evidence available), link to the review questions and objectives, and consider the relevance to key groups. |                    |
| Limitations                                   | 20   | Discuss the limitations of the scoping review process.                                                                                                                                          |                    |
| Conclusions                                   | 21   | Provide a general interpretation of the results with respect to the review questions and objectives, as well as potential implications and/or next steps.                                       |                    |
| <b>FUNDING</b>                                |      |                                                                                                                                                                                                 |                    |
| Funding                                       | 22   | Describe sources of funding for the included sources of evidence, as well as sources of funding for the scoping review. Describe the role of the funders of the scoping review.                 |                    |

JBI = Joanna Briggs Institute; PRISMA-ScR = Preferred Reporting Items for Systematic reviews and Meta-Analyses extension for Scoping Reviews.

\* Where *sources of evidence* (see second footnote) are compiled from, such as bibliographic databases, social media platforms, and Web sites.

† A more inclusive/heterogeneous term used to account for the different types of evidence or data sources (e.g., quantitative and/or qualitative research, expert opinion, and policy documents) that may be eligible in a scoping review as opposed to only studies. This is not to be confused with *information sources* (see first footnote).

‡ The frameworks by Arksey and O'Malley (6) and Levac and colleagues (7) and the JBI guidance (4, 5) refer to the process of data extraction in a scoping review as data charting.

§ The process of systematically examining research evidence to assess its validity, results, and relevance before using it to inform a decision. This term is used for items 12 and 19 instead of "risk of bias" (which is more applicable to systematic reviews of interventions) to include and acknowledge the various sources of evidence that may be used in a scoping review (e.g., quantitative and/or qualitative research, expert opinion, and policy document).

From: Tricco AC, Lillie E, Zarin W, O'Brien KK, Colquhoun H, Levac D, et al. PRISMA Extension for Scoping Reviews (PRISMA-ScR): Checklist and Explanation. *Ann Intern Med.* 2018;169:467–473. doi: [10.7326/M18-0850](https://doi.org/10.7326/M18-0850).



Supplement: bmjopen-2020-037643.draft_revisions.pdf [file bmjopen-2020-037643.draft_revisions.pdf]
